# Supplementary material for: Transgenic sensors reveal compartment-specific effects of aggregation-prone proteins on subcellular proteostasis during aging
Source: PubMed Central journal article supplement — Cell Rep Methods. 2024 Oct 8;4(10):100875. doi: 10.1016/j.crmeth.2024.100875 (PMC11573793; doi:10.1016/j.crmeth.2024.100875), 2024-10-08

# Full Blot Scans by Figure

Curley et al.

**Transgenic sensors reveal compartment-specific effects of endocrine signaling and aggregation-prone proteins on subcellular proteostasis during aging**

Figure 4a Heat Shock

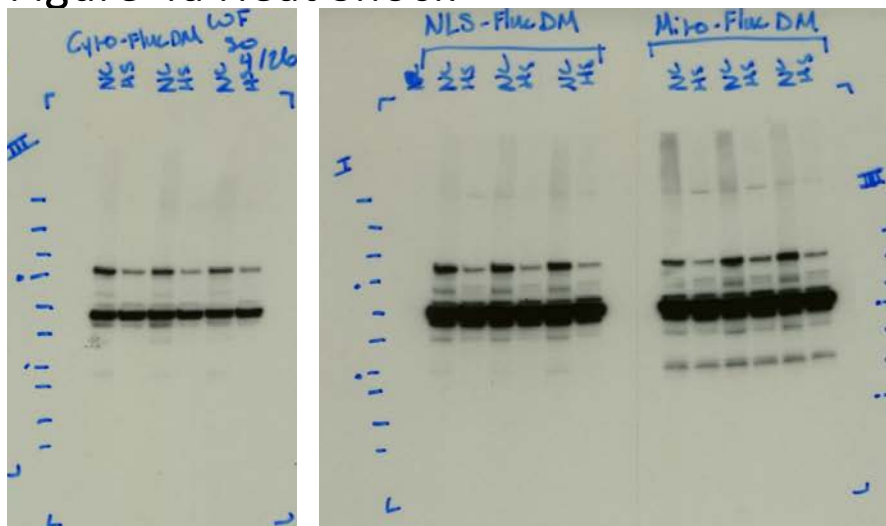

Anti-GFP

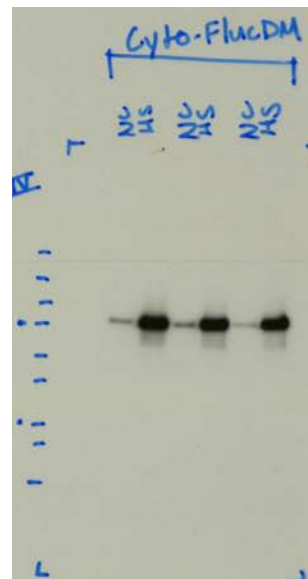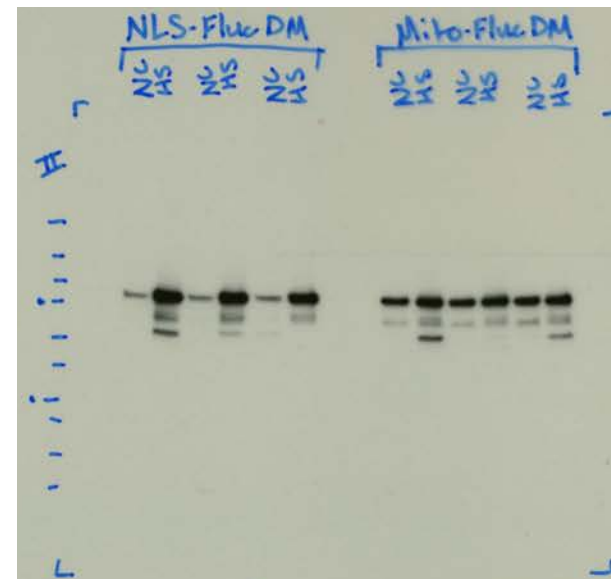

Detergent-Soluble

Detergent-Insoluble

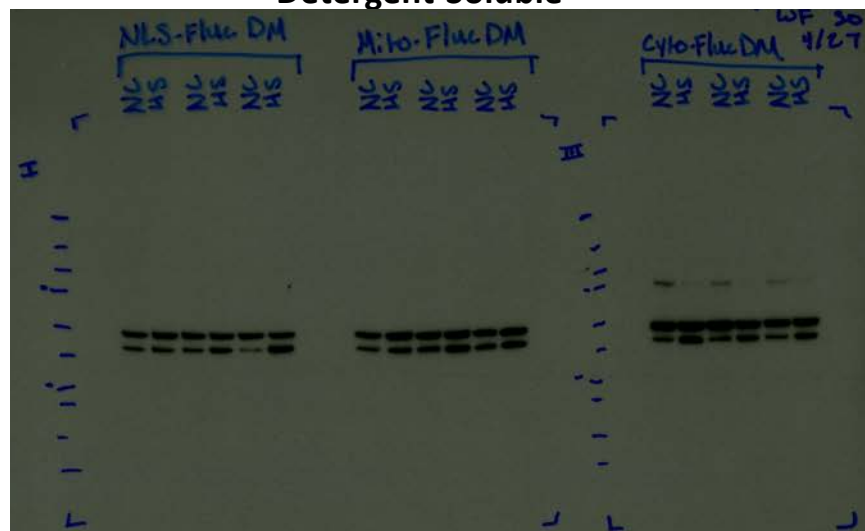

Anti-Beta Actin

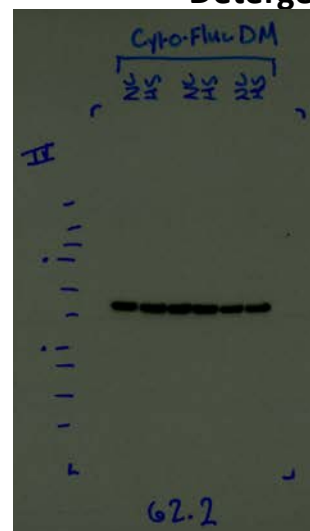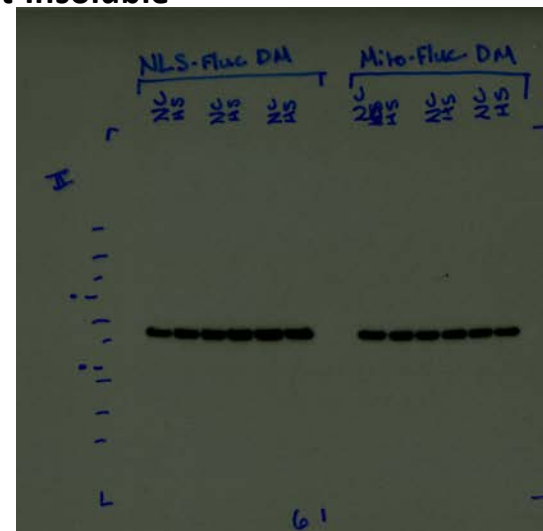

Figure 4b Cold Shock

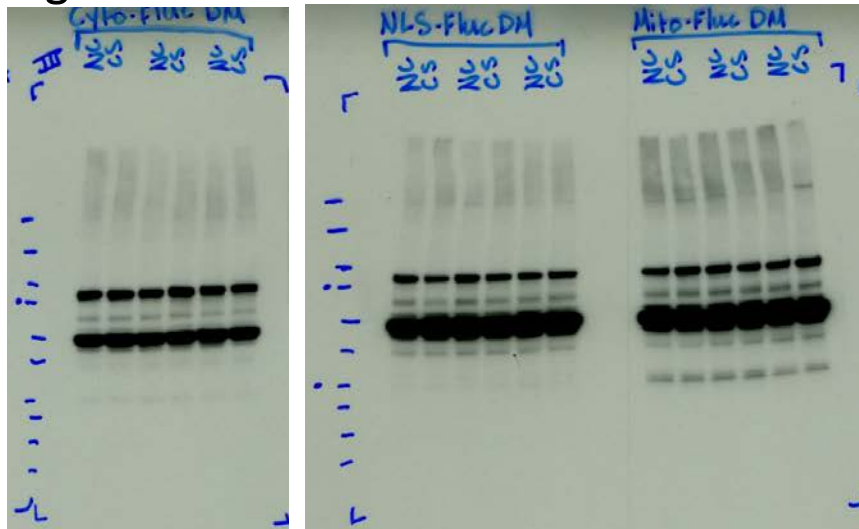

Anti-GFP

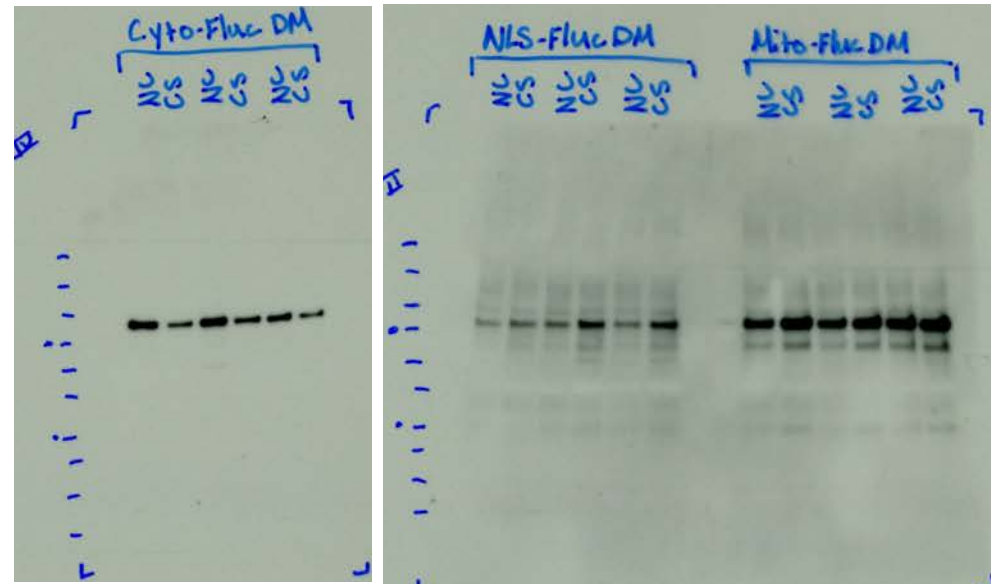

Detergent-Soluble

Detergent-Insoluble

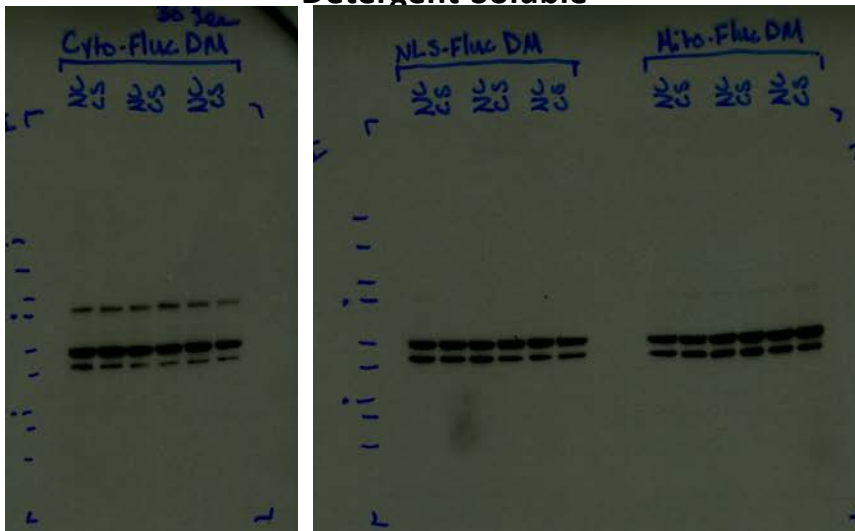

Anti-Beta Actin

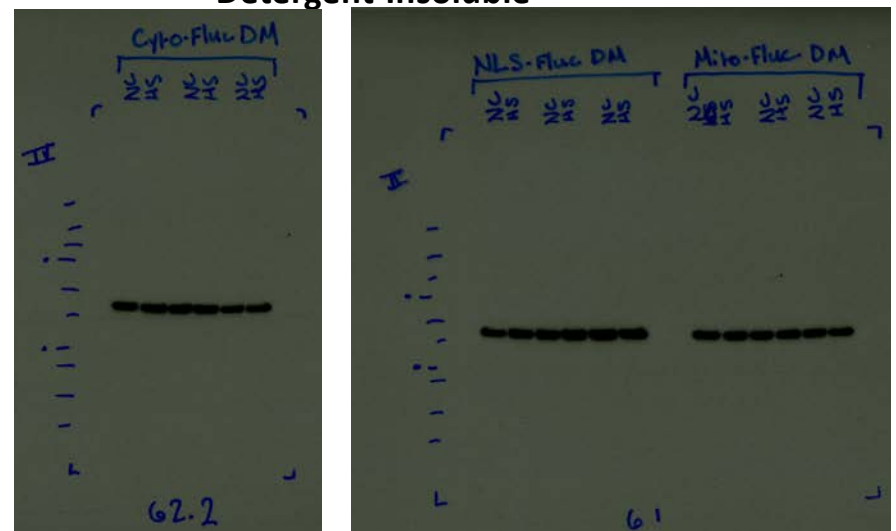

Figure 5a, 5b, 5c detergent-soluble Fluc Akh Whole Flies

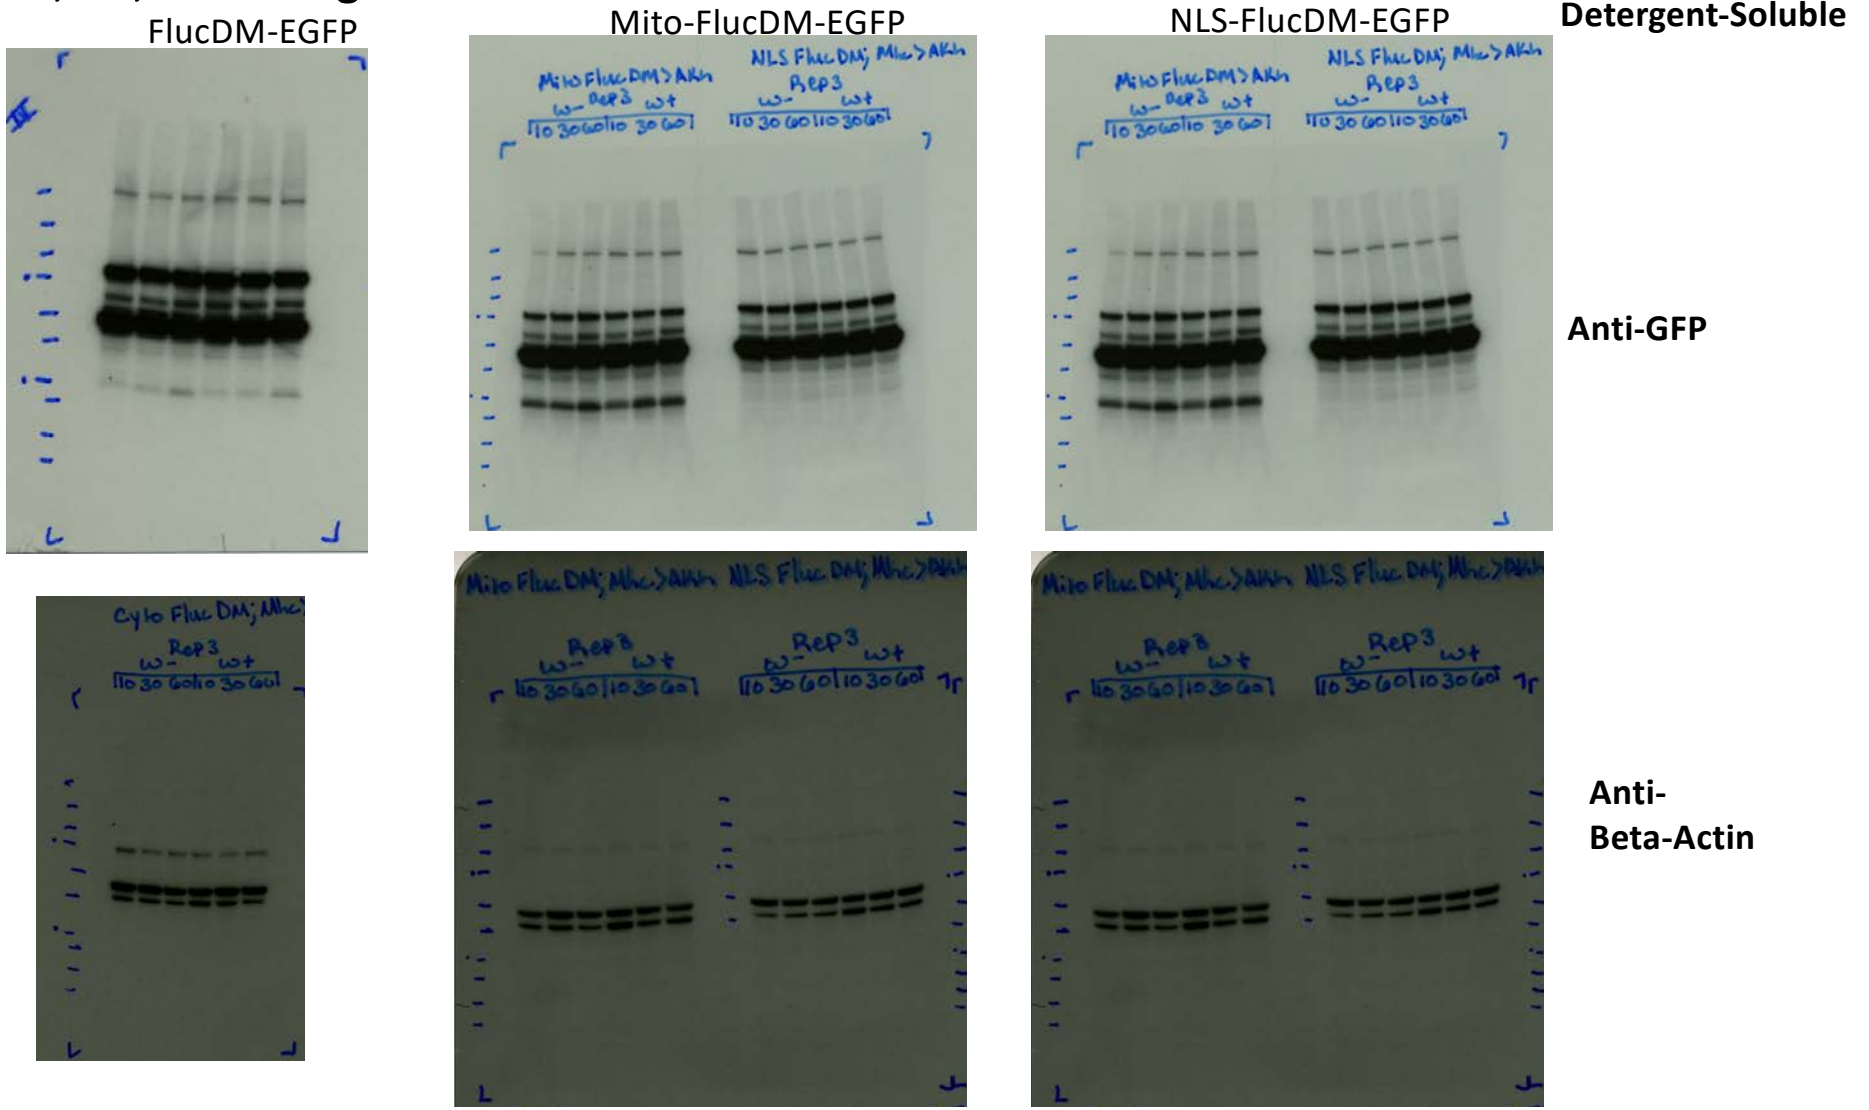

Figure 5a, 5b, 5c detergent-insoluble Fluc Akh Whole Flies

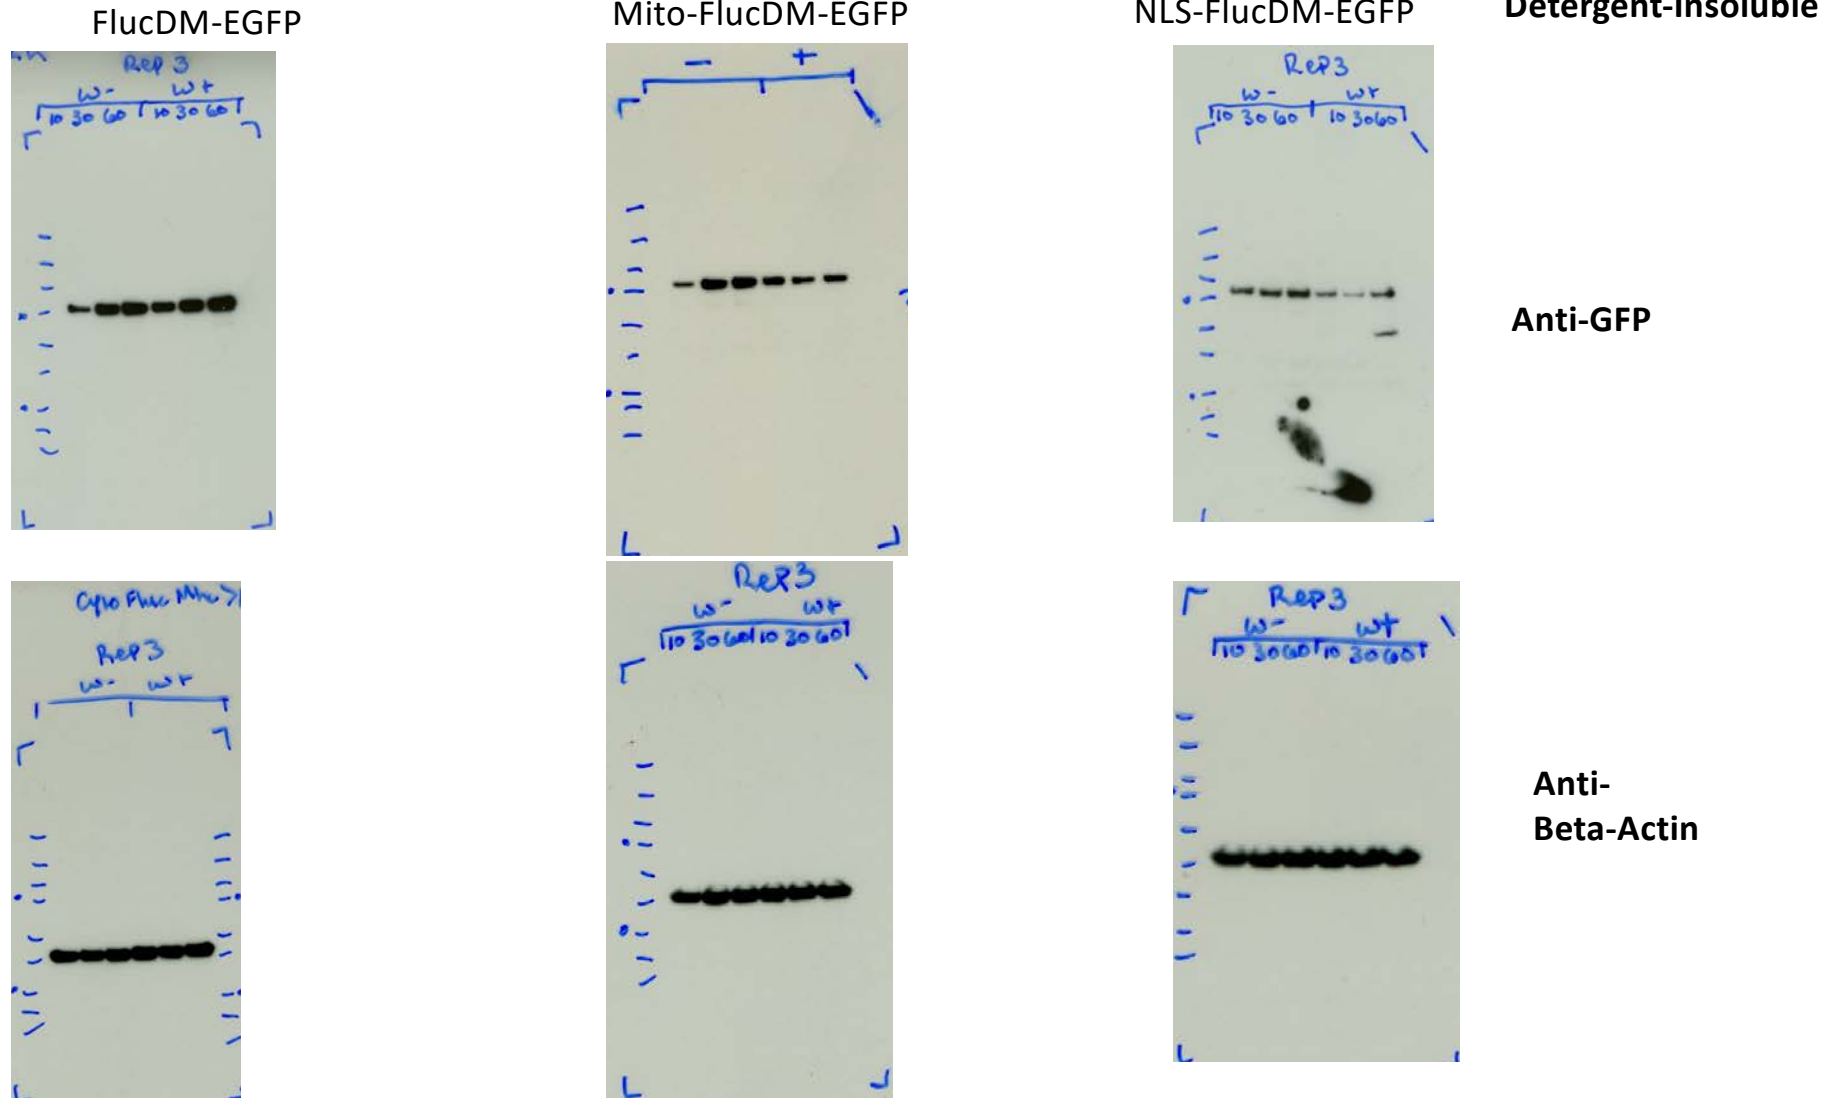

Figure 5d, 5e, 5f detergent-soluble Fluc Amyrel Heads  
 FlucDM-EGFP Mito-FlucDM-EGFP NLS-FlucDM-EGFP

Detergent-Soluble

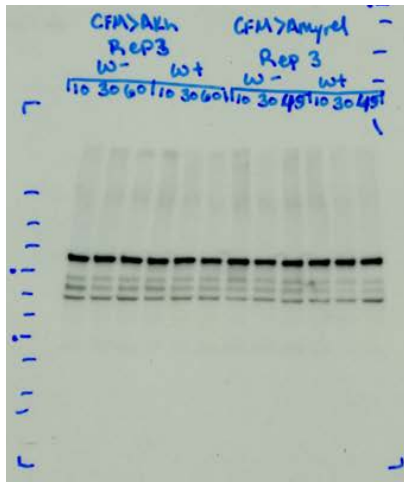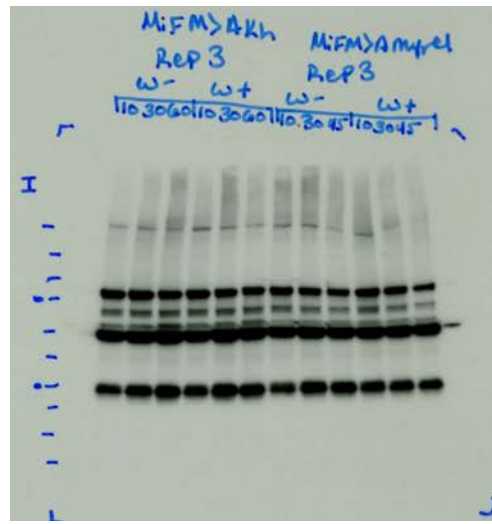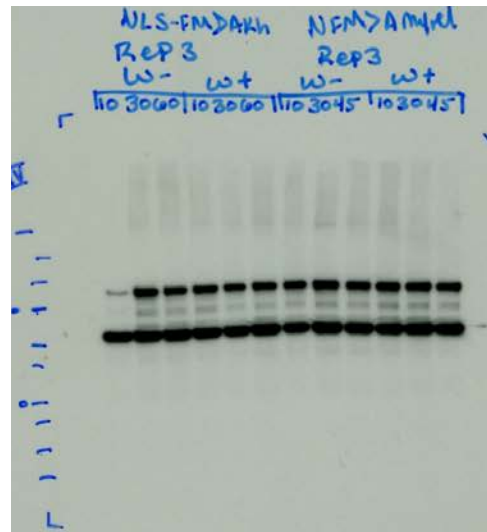

Anti-GFP

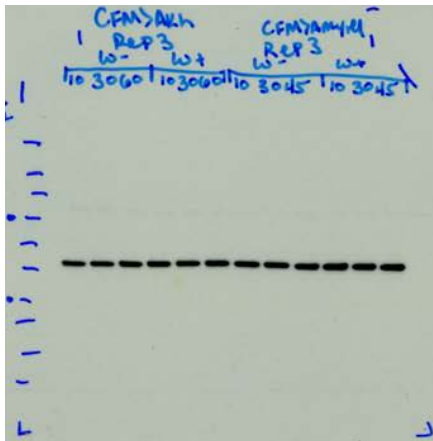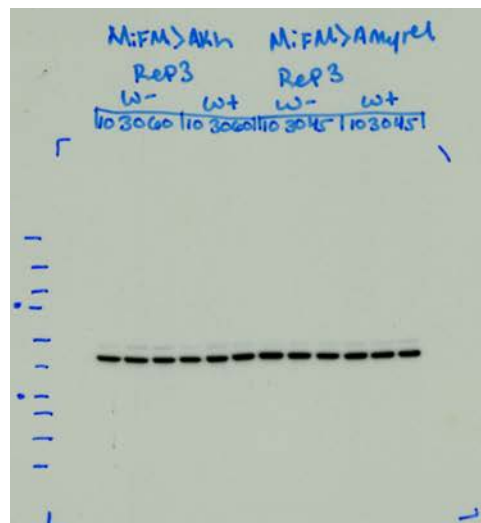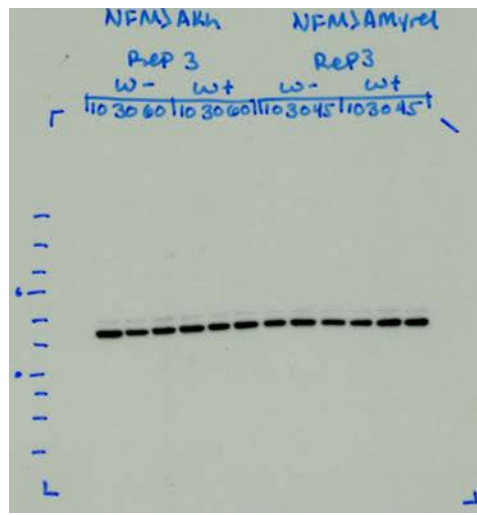

Anti-Beta-Actin

Figure 5d, 5e, 5f detergent-insoluble Fluc Amyrel Heads

FlucDM-EGFP

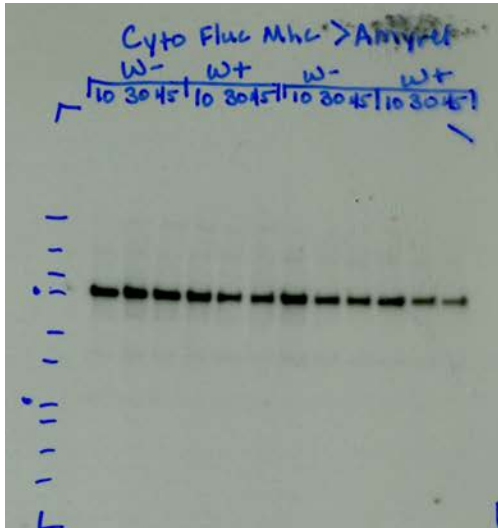

Mito-FlucDM-EGFP

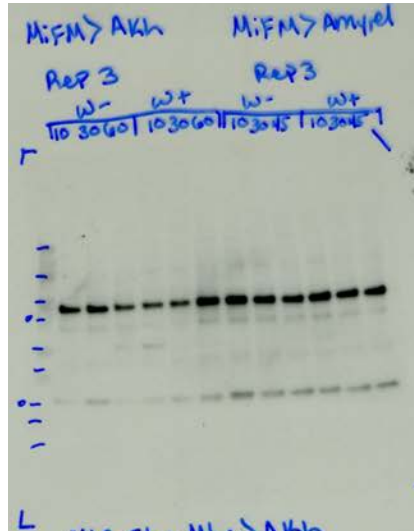

NLS-FlucDM-EGFP

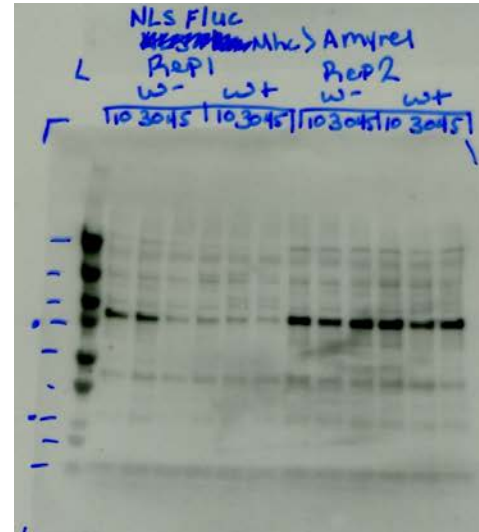

Detergent-Insoluble

Anti-GFP

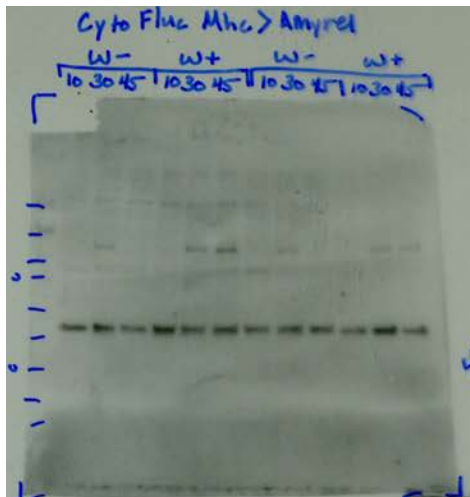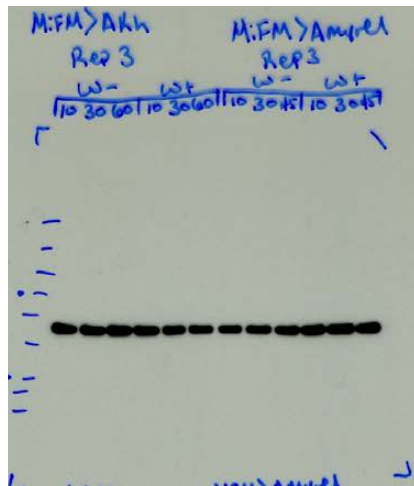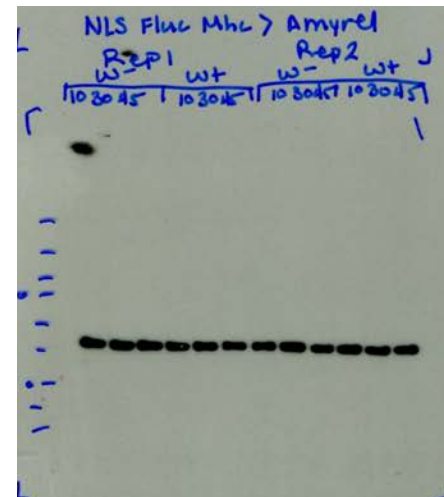

Anti-Beta-Actin

Figure 6a, 6b, 6c detergent-soluble FTD Poly Q

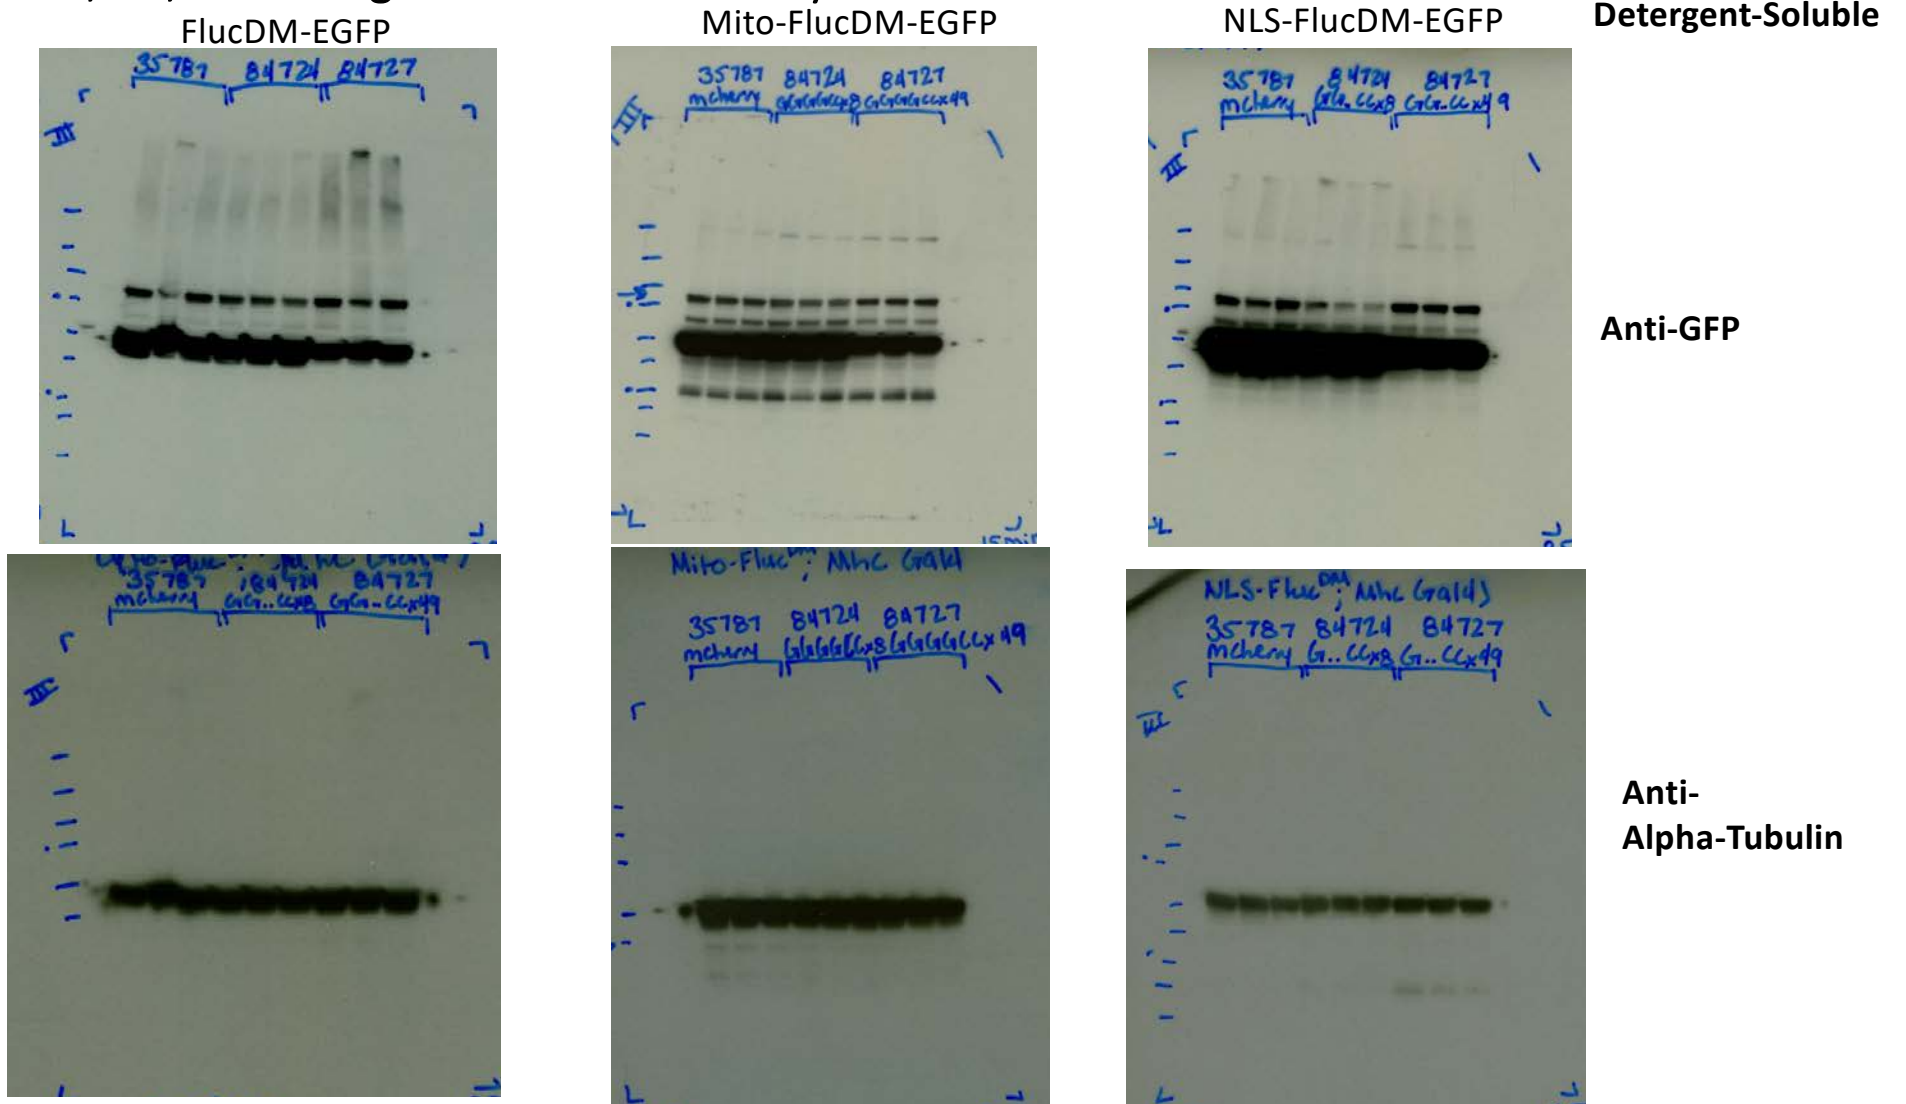



Figure 6a, 6b, 6c detergent-insoluble FTD Poly Q

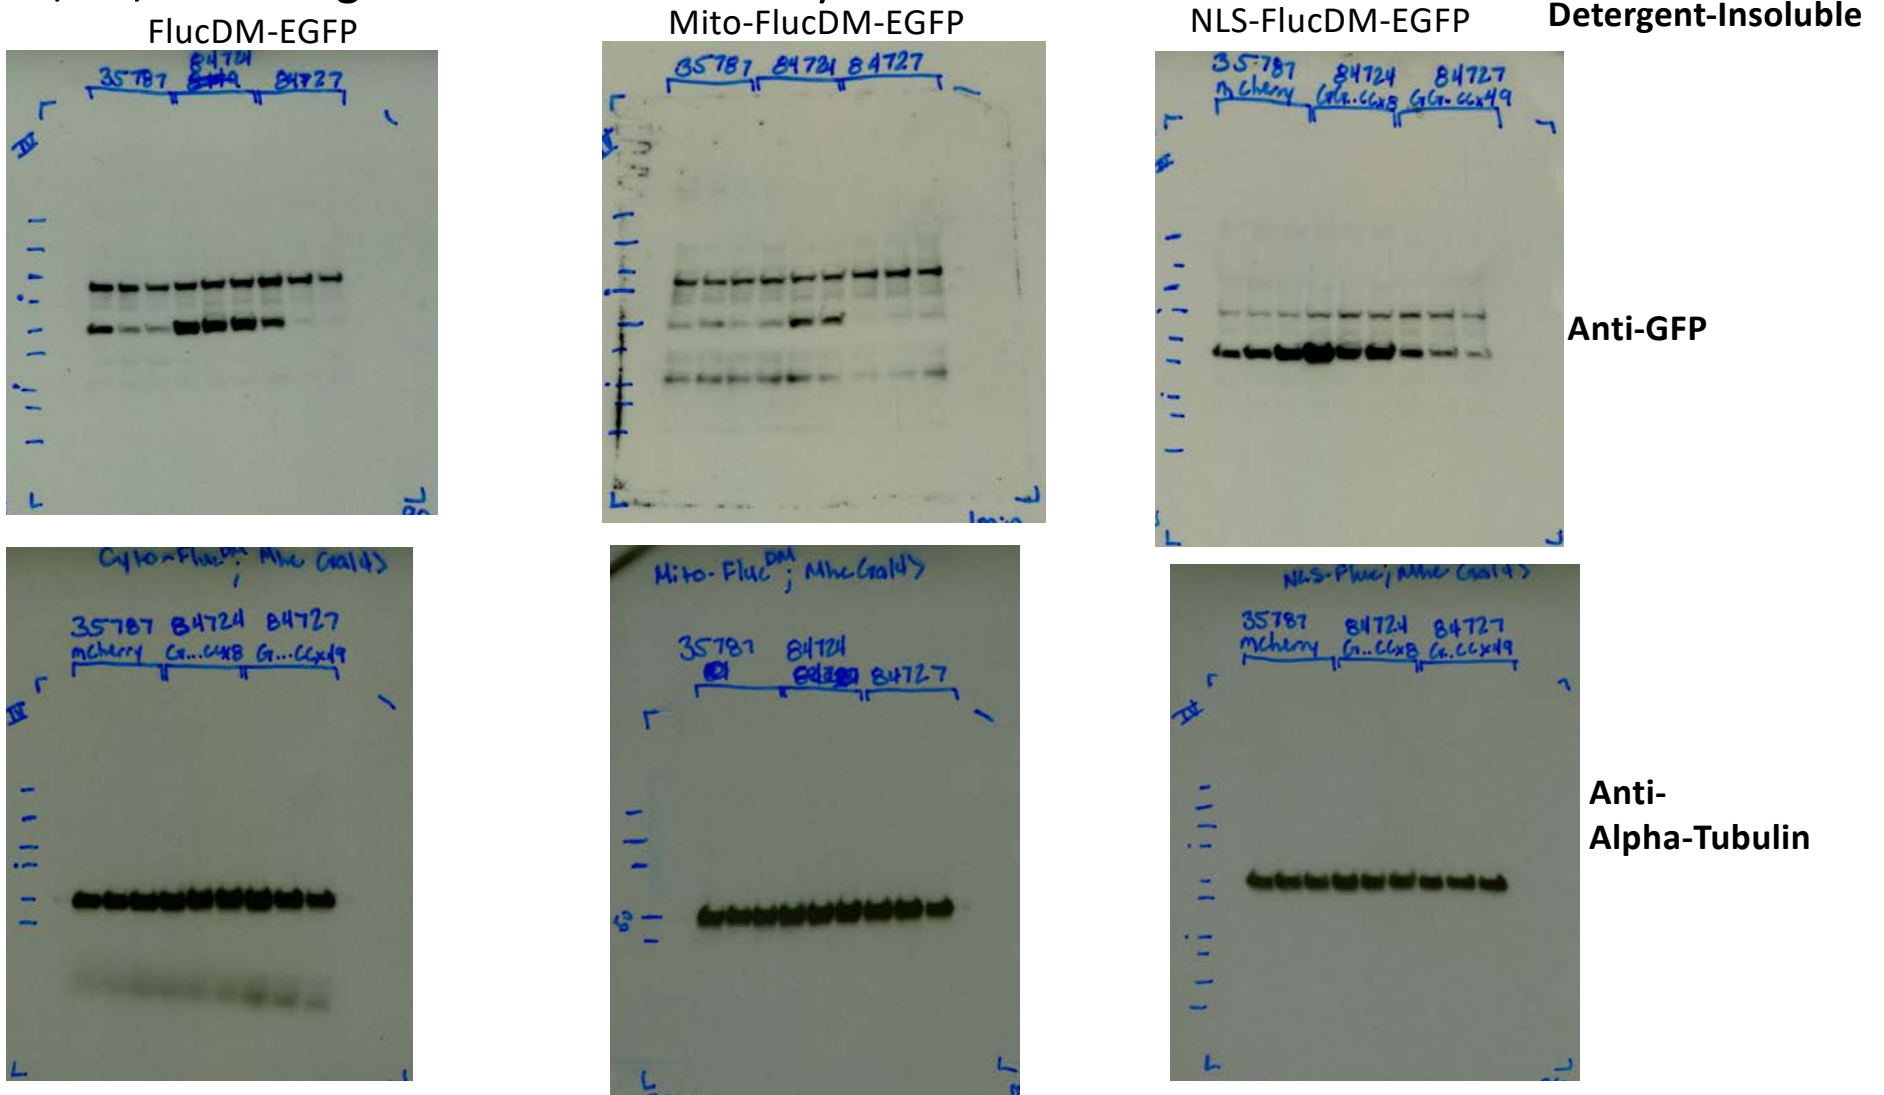

Figure 6d, 6e, 6f detergent-soluble hAtxn3 PolyQ

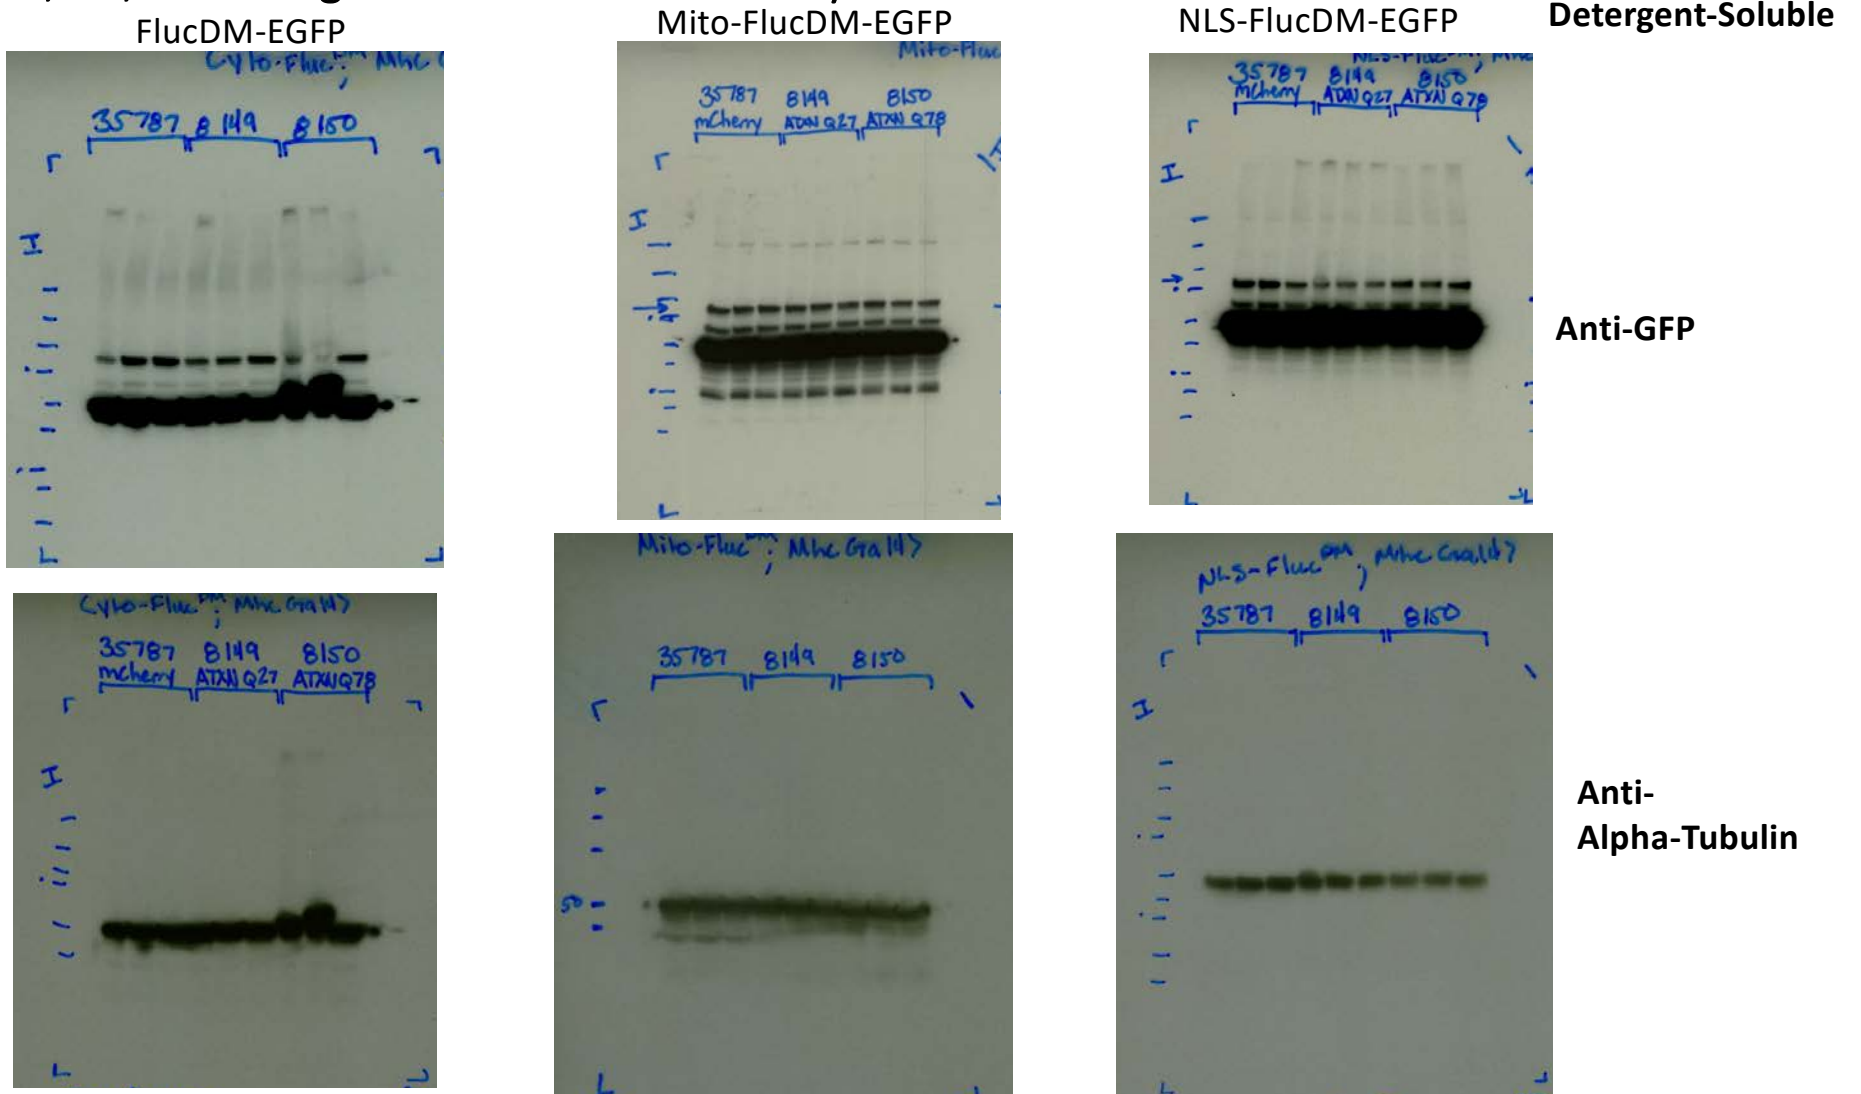

Figure 6d, 6e, 6f detergent-insoluble hAtxn3 PolyQ

FlucDM-EGFP

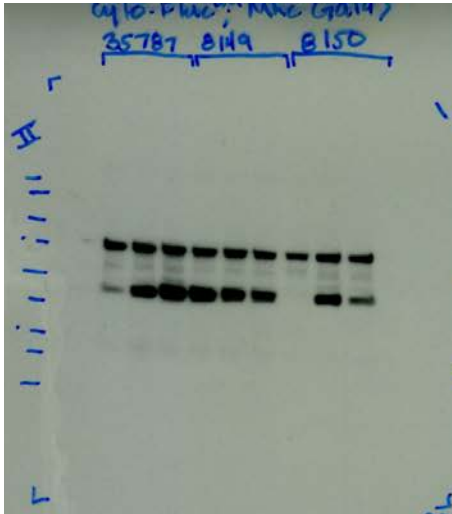

Mito-FlucDM-EGFP

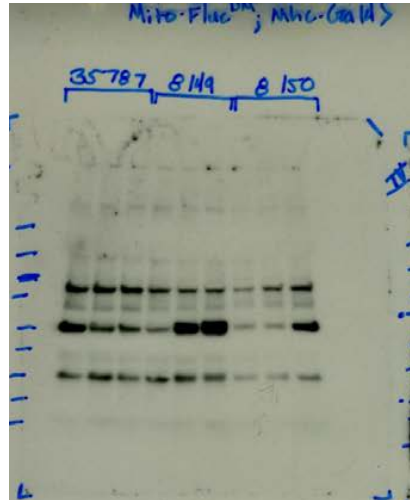

NLS-FlucDM-EGFP

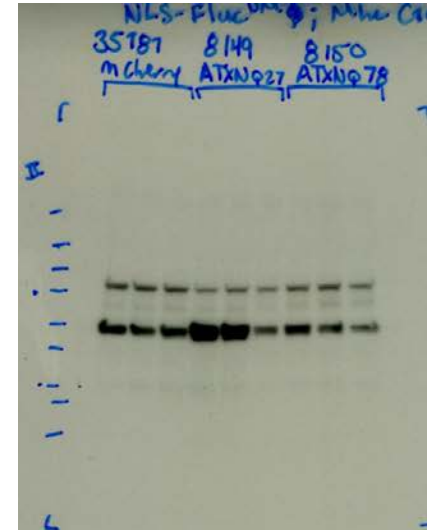

Detergent-Insoluble

Anti-GFP

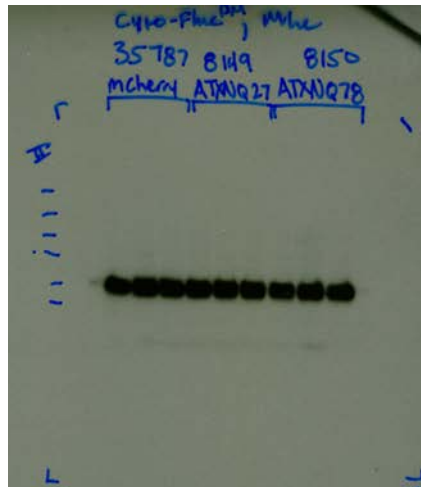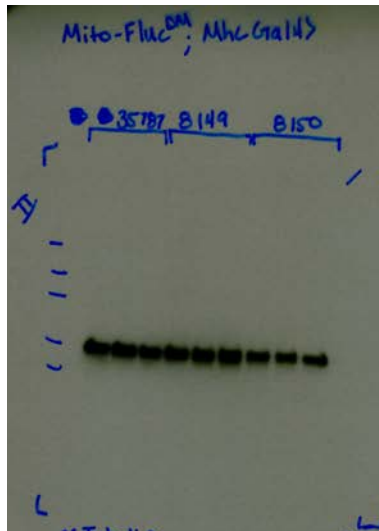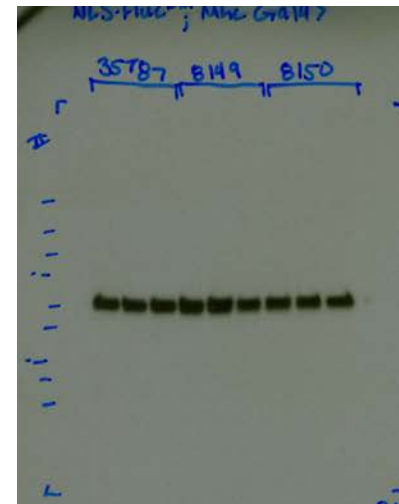

Anti-  
Alpha-Tubulin

Figure 7a, 7b, 7c detergent-soluble hTau Heads

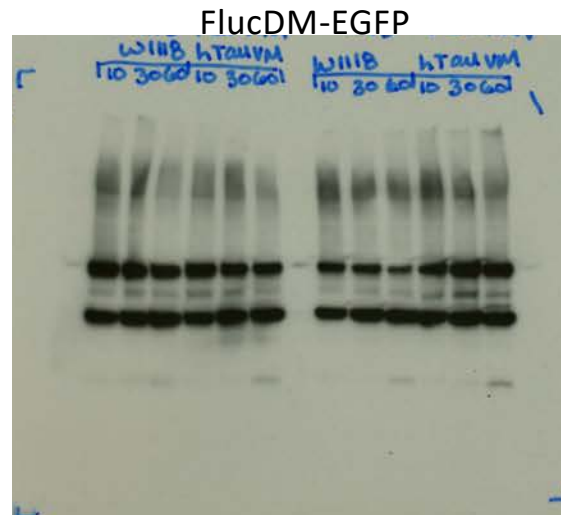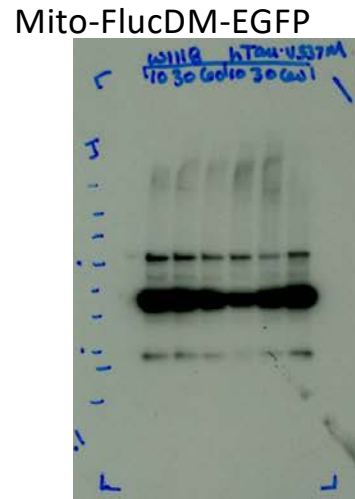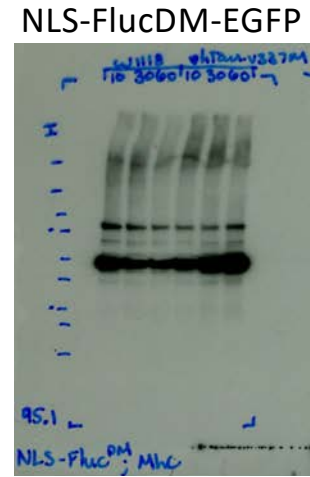

Detergent-Soluble

Anti-GFP

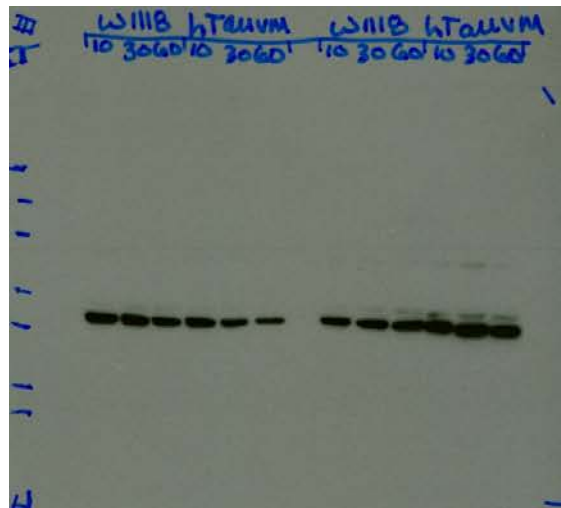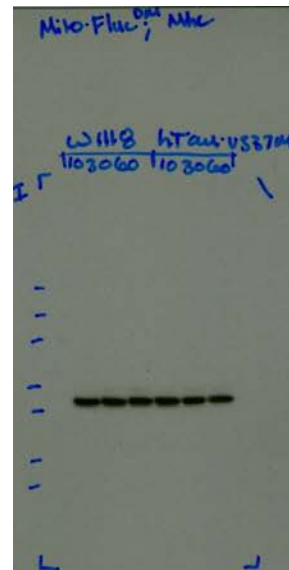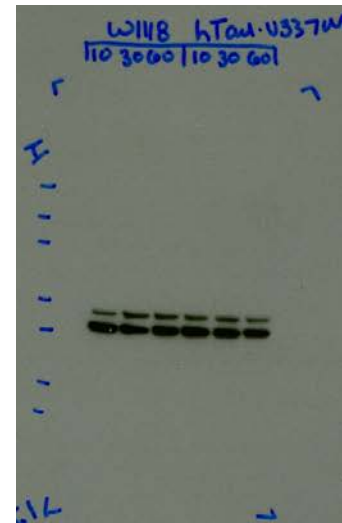

Anti-  
Beta-Actin

Figure 7a, 7b, 7c detergent-insoluble hTau Heads

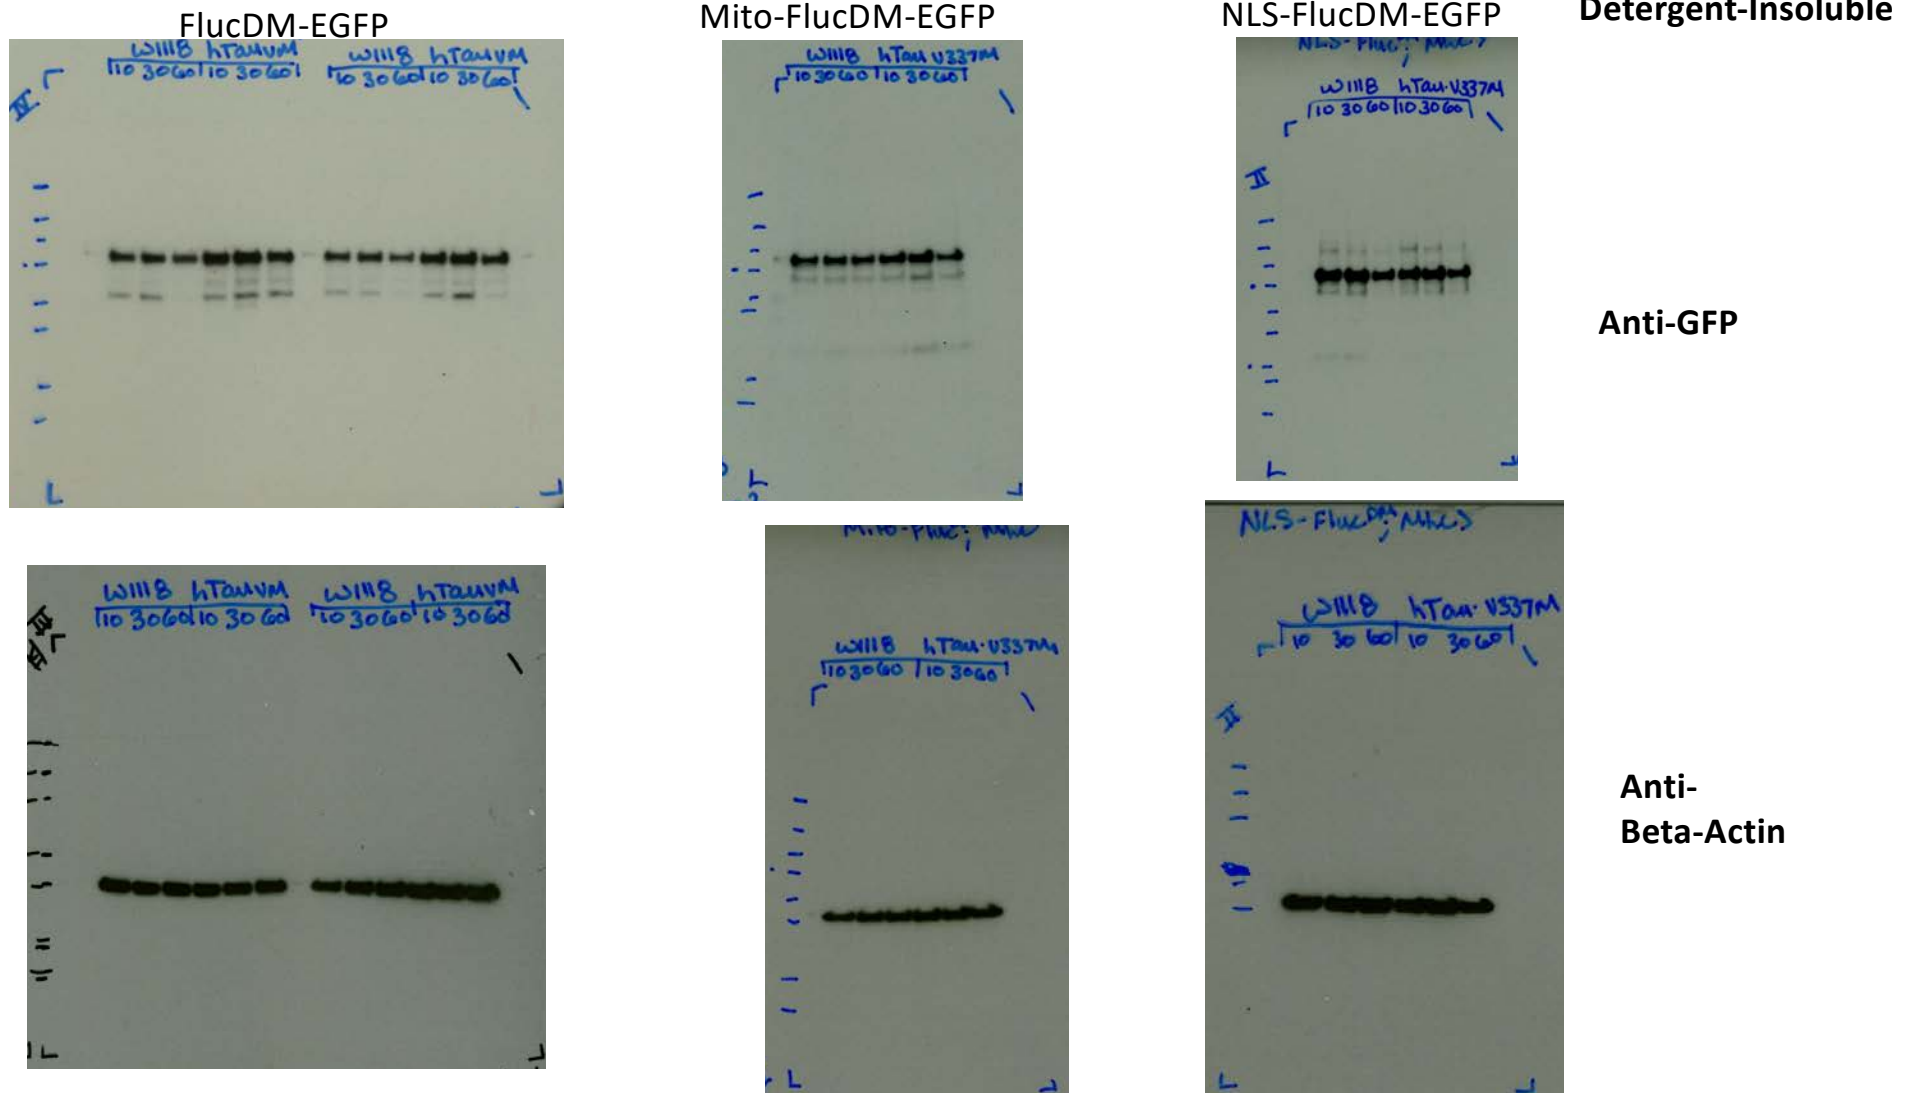

Figure 7d, 7e, 7f detergent-soluble hTau thoraces

FlucDM-EGFP

Mito-FlucDM-EGFP

NLS-FlucDM-EGFP

Detergent-Soluble

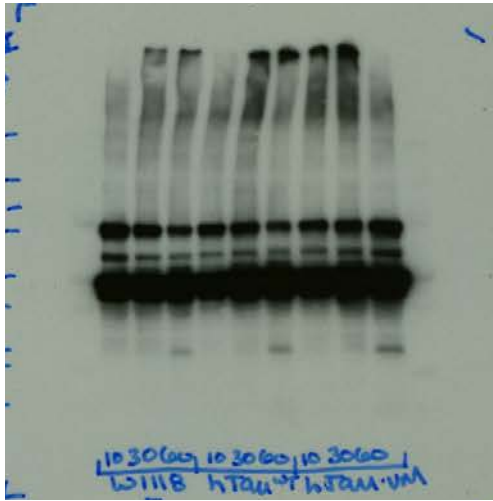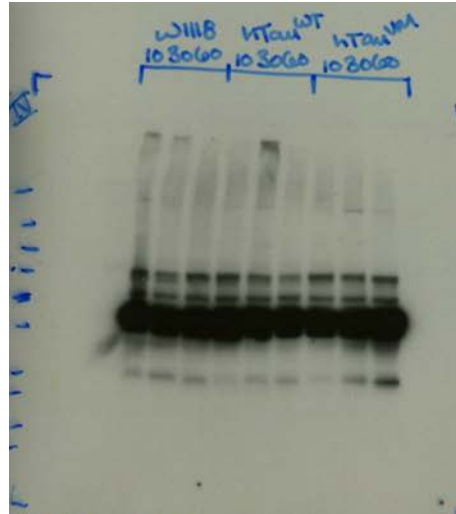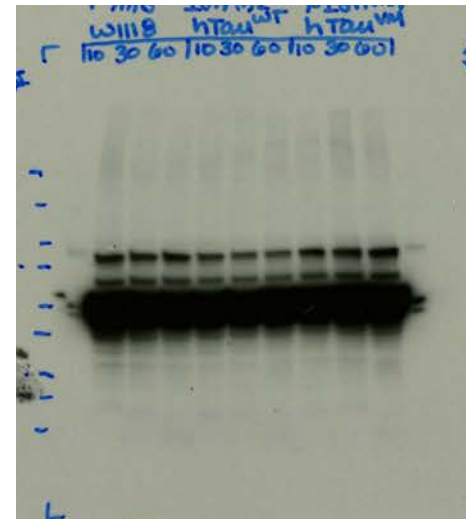

Anti-GFP

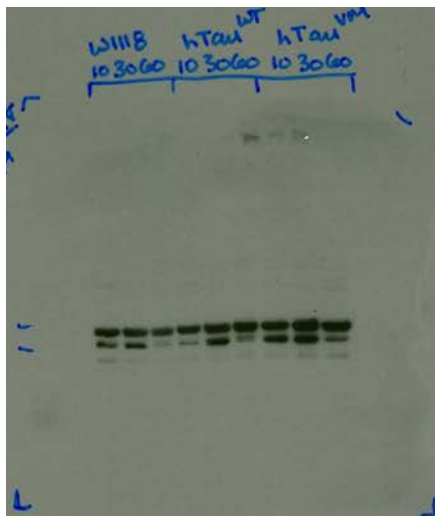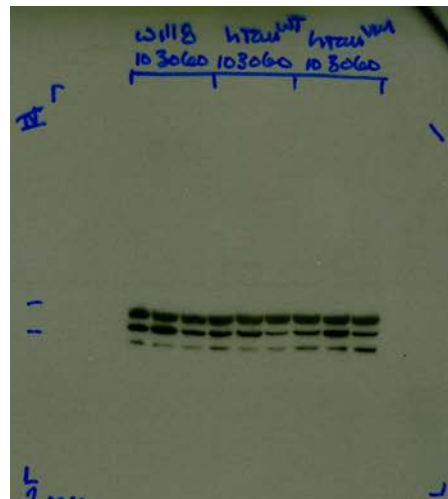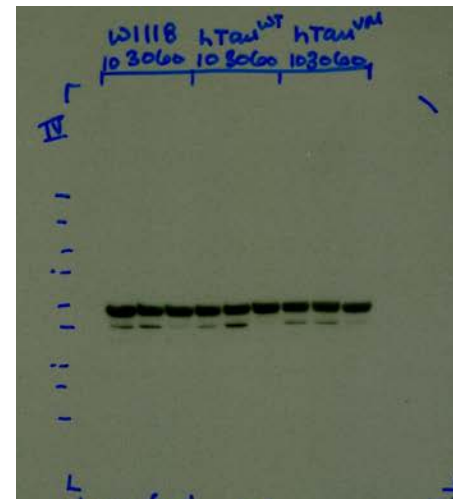

Anti-  
Beta-Actin

Figure 7d, 7e, 7f detergent-insoluble hTau thoraces

FlucDM-EGFP

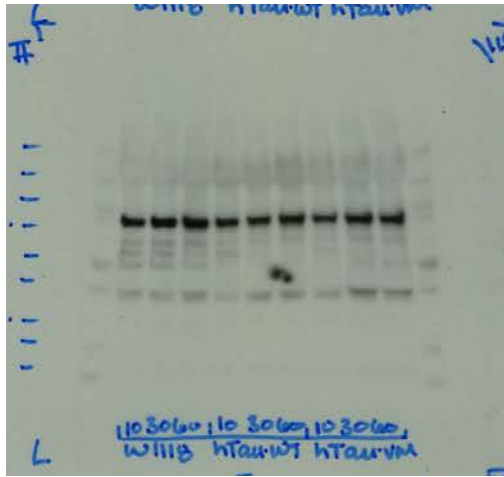

Mito-FlucDM-EGFP

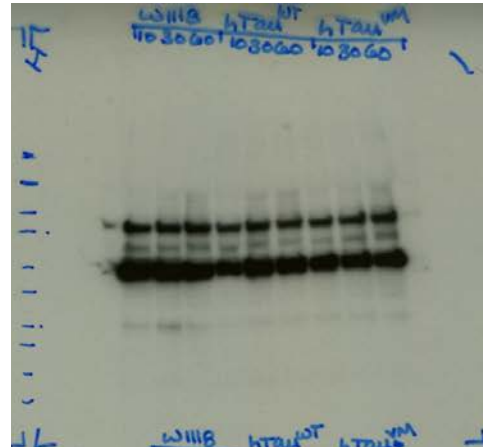

NLS-FlucDM-EGFP

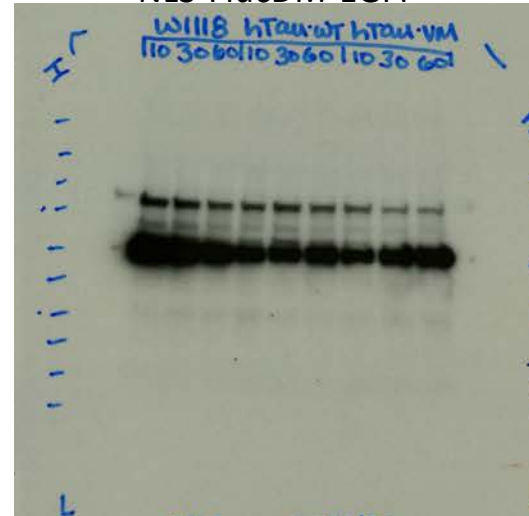

Detergent-Insoluble

Anti-GFP

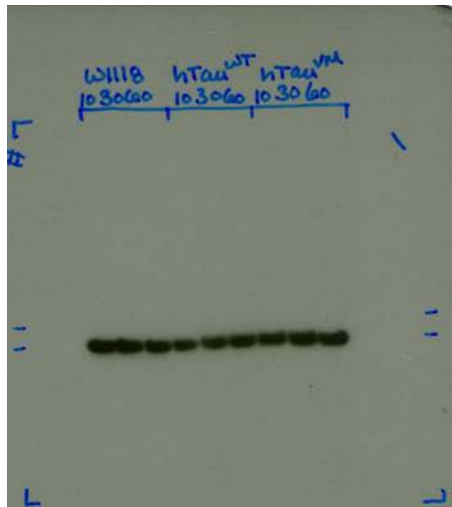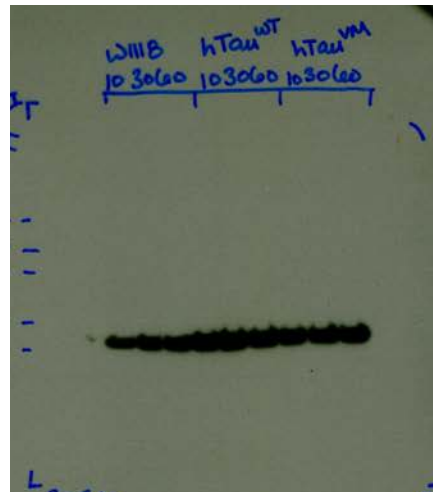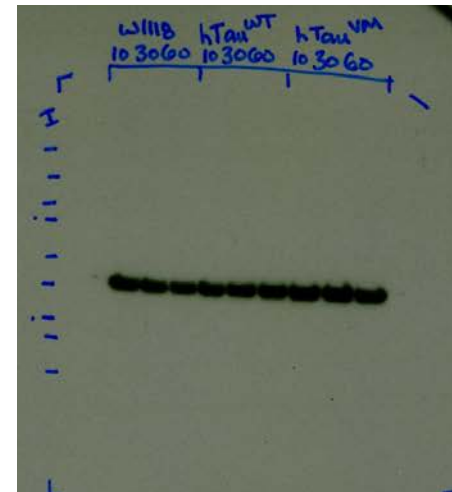

Anti-  
Beta-Actin

# Supplementary Figure 1 HSP70 Knockdown

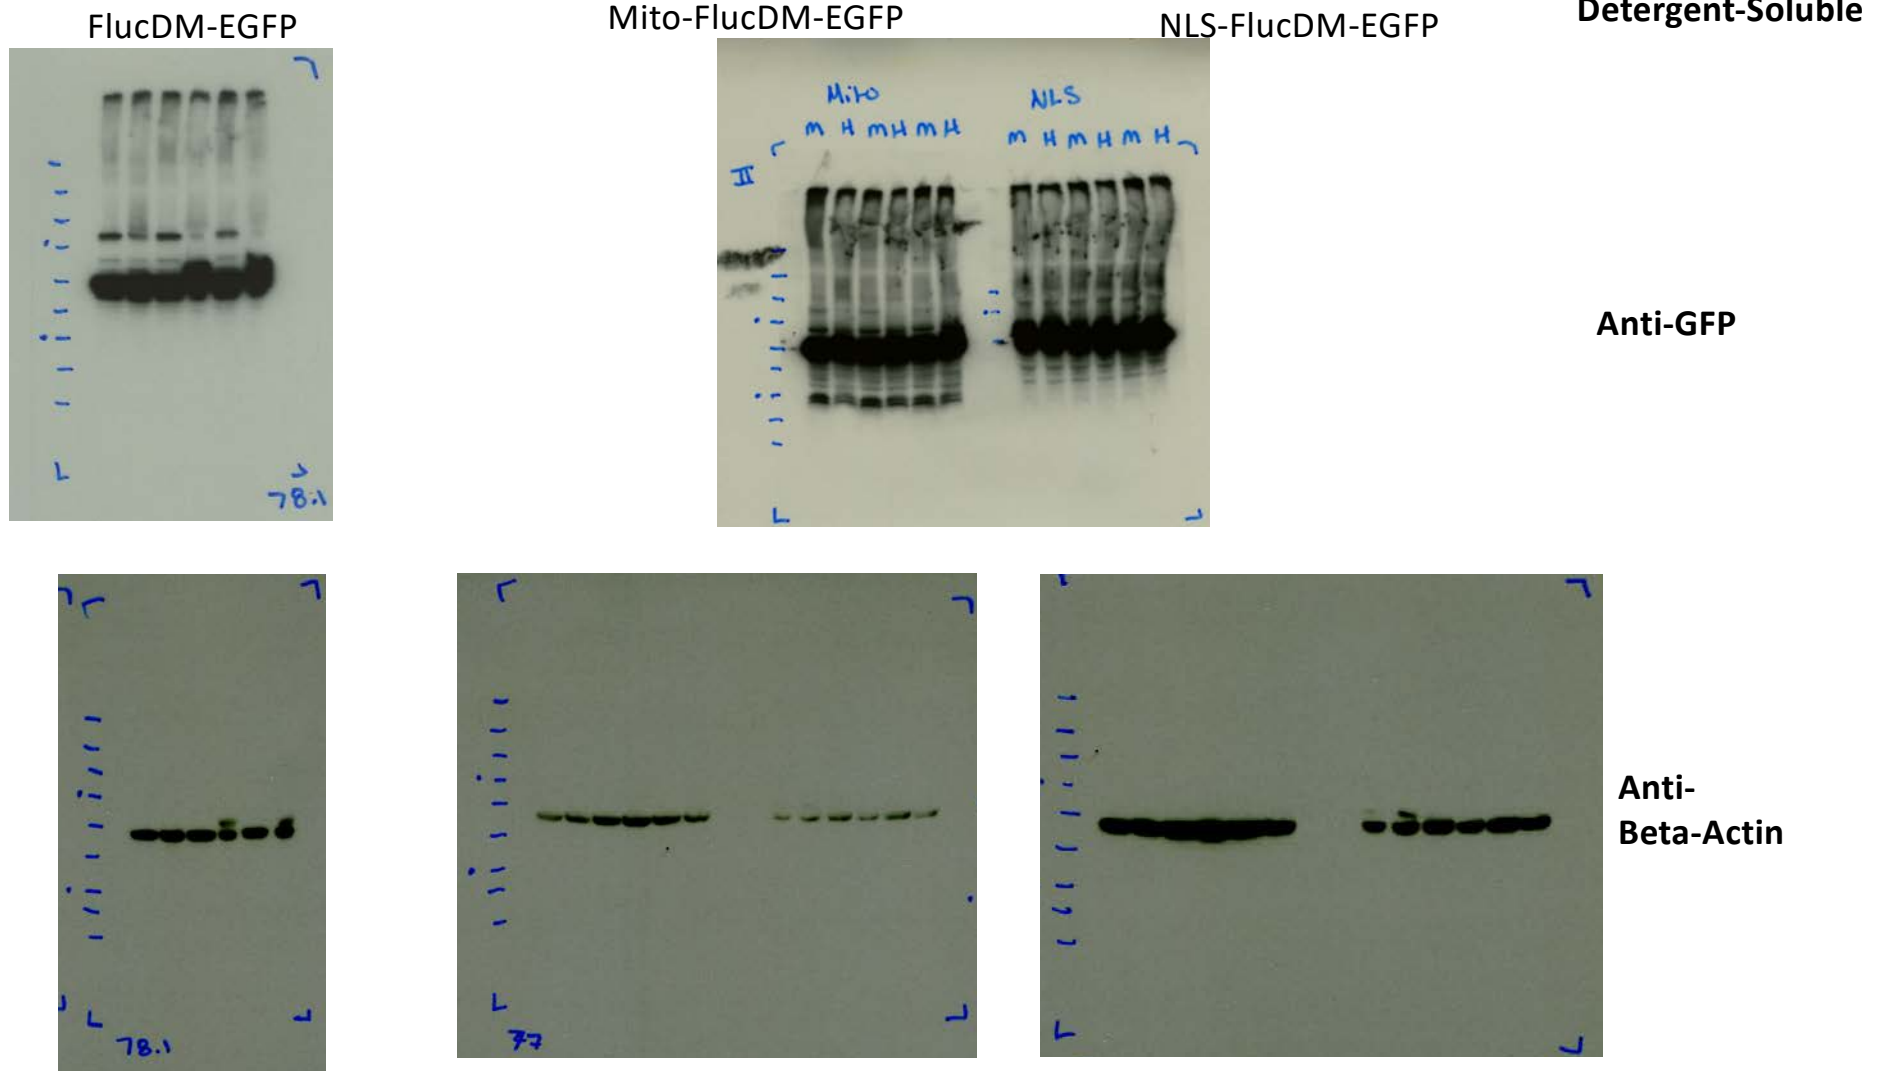



# Supplementary Figure 1 HSP70 Knockdown

FlucDM-EGFP

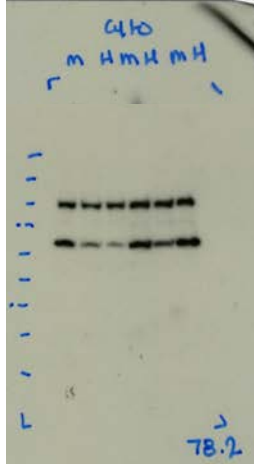

Mito-FlucDM-EGFP

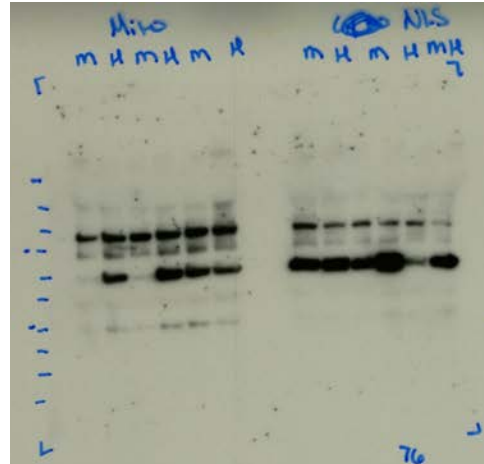

NLS-FlucDM-EGFP



Detergent-Insoluble

Anti-GFP

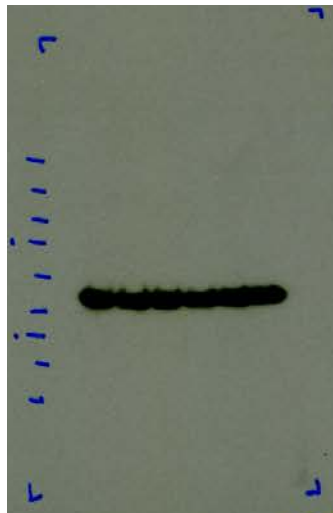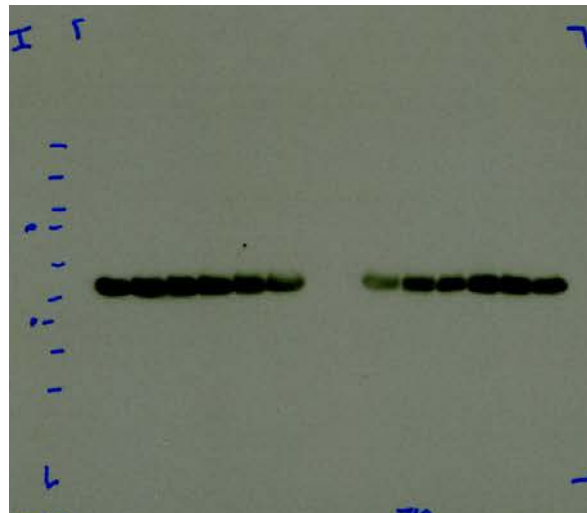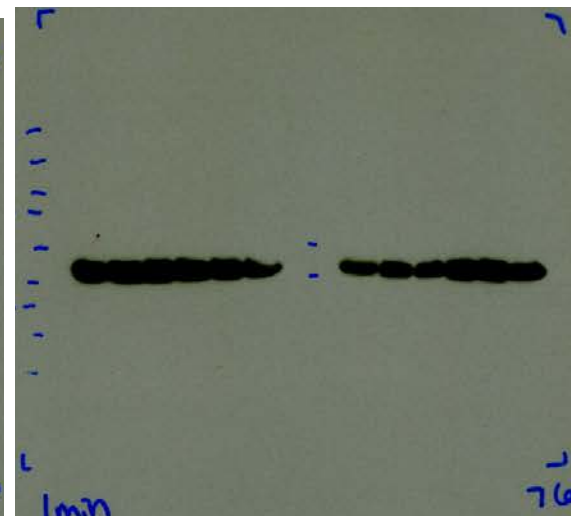

Anti-Beta-Actin

# Supplementary Figure 2: FlucDM-EGFP HSP22

## Anti-GFP

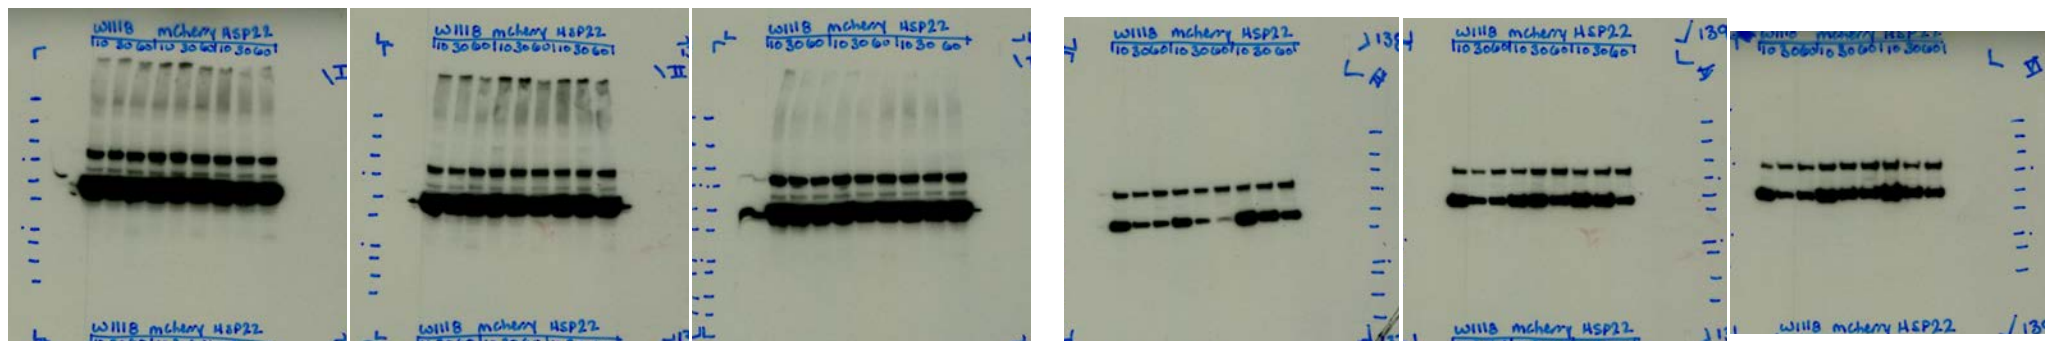

## Detergent-Soluble

## Anti-Alpha Tubulin

## Detergent-Insoluble

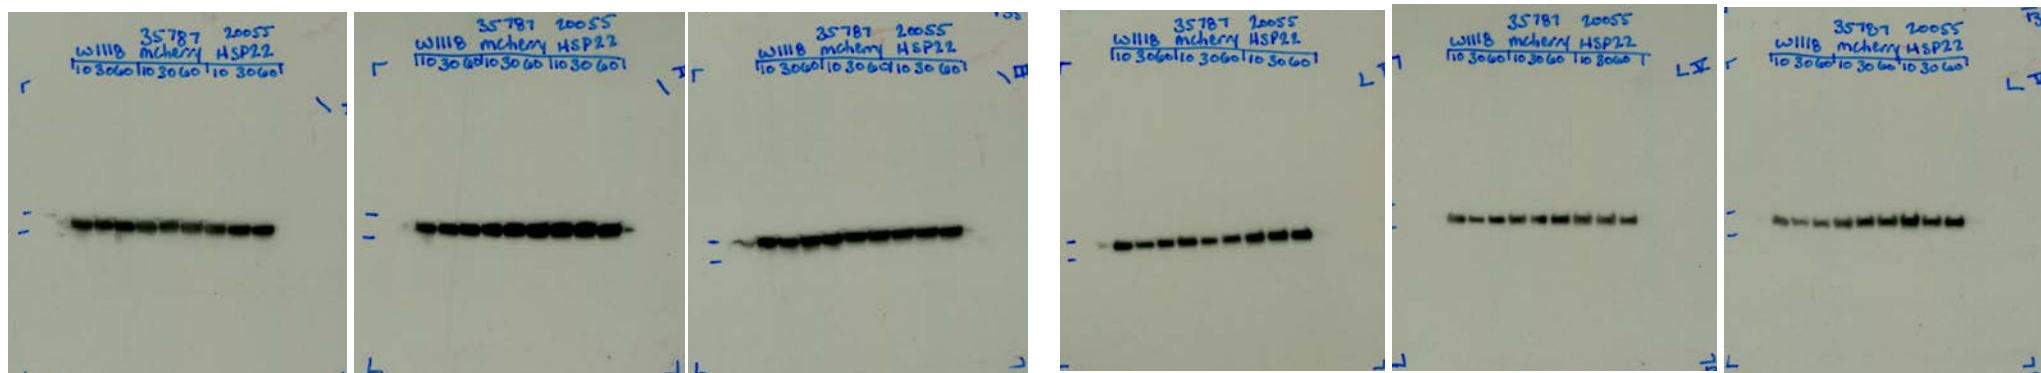

# Supplementary Figure 2: mito-FlucDM-EGFP HSP22

## Anti-GFP

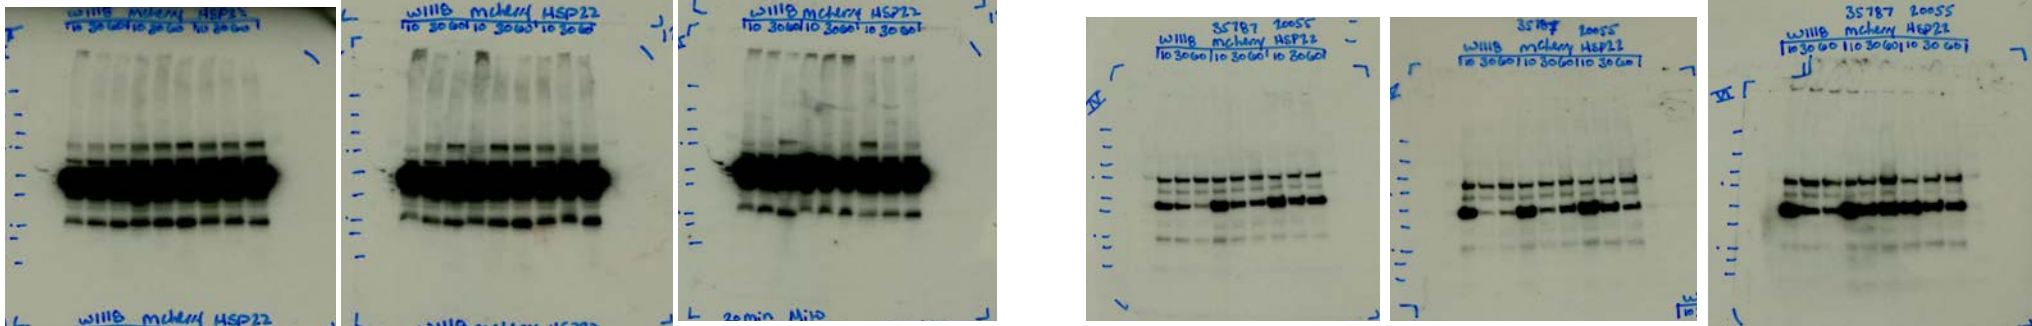

## Detergent-Soluble

## Anti-Alpha-Tubulin

## Detergent-Insoluble

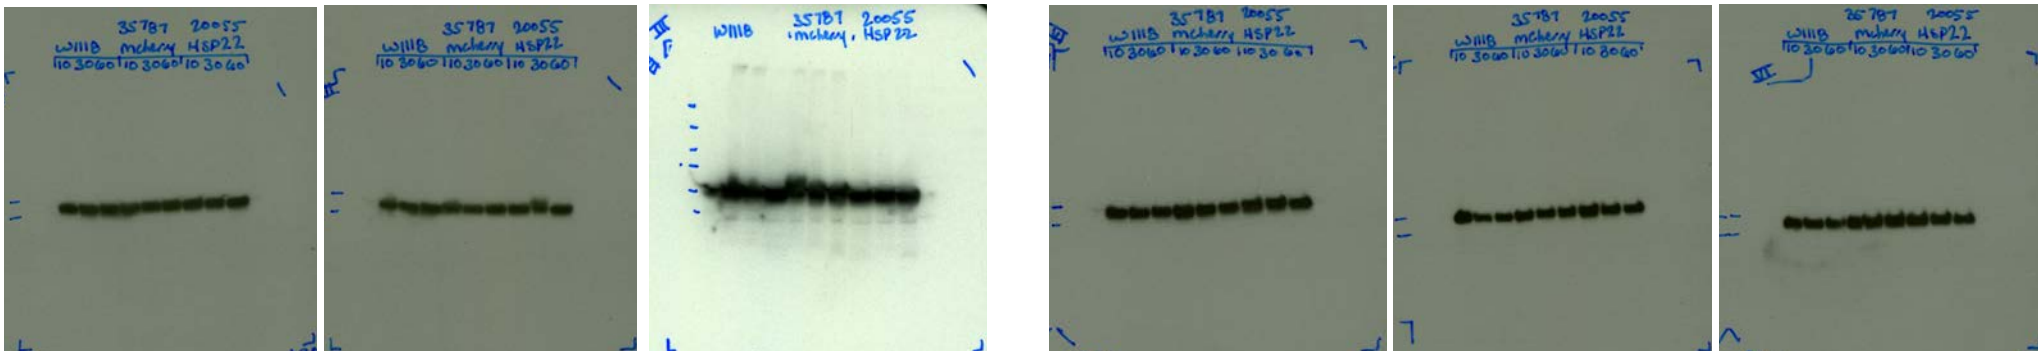

# Supplementary Figure 2: NLS-FlucDM-EGFP HSP22

## Anti-GFP

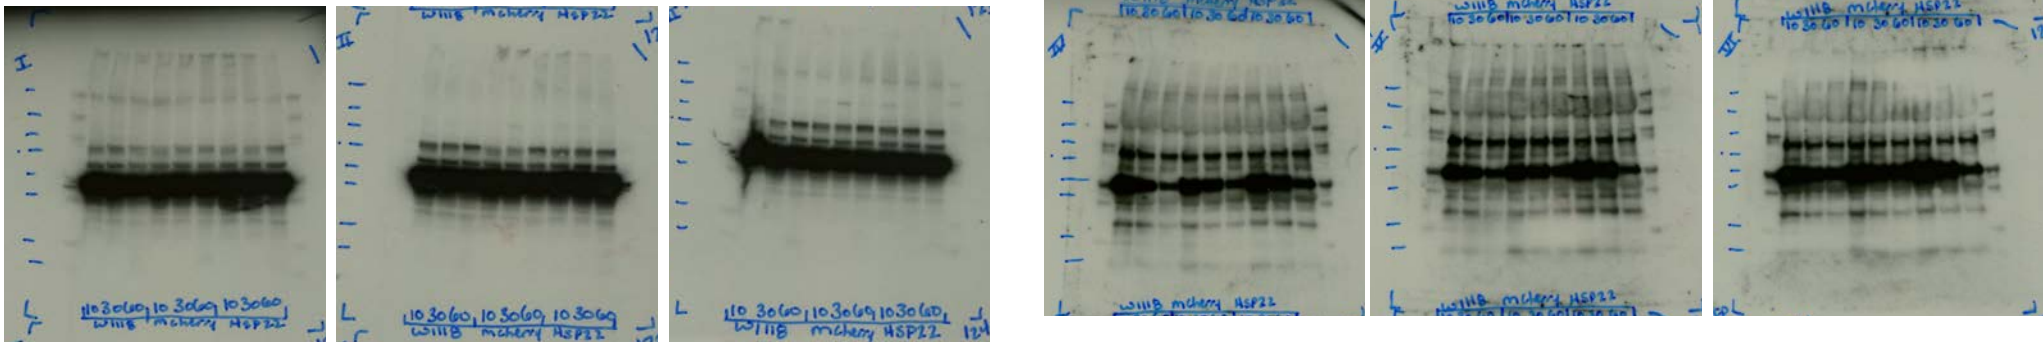

## Detergent-Soluble

## Anti-Alpha-Tubulin

## Detergent-Insoluble

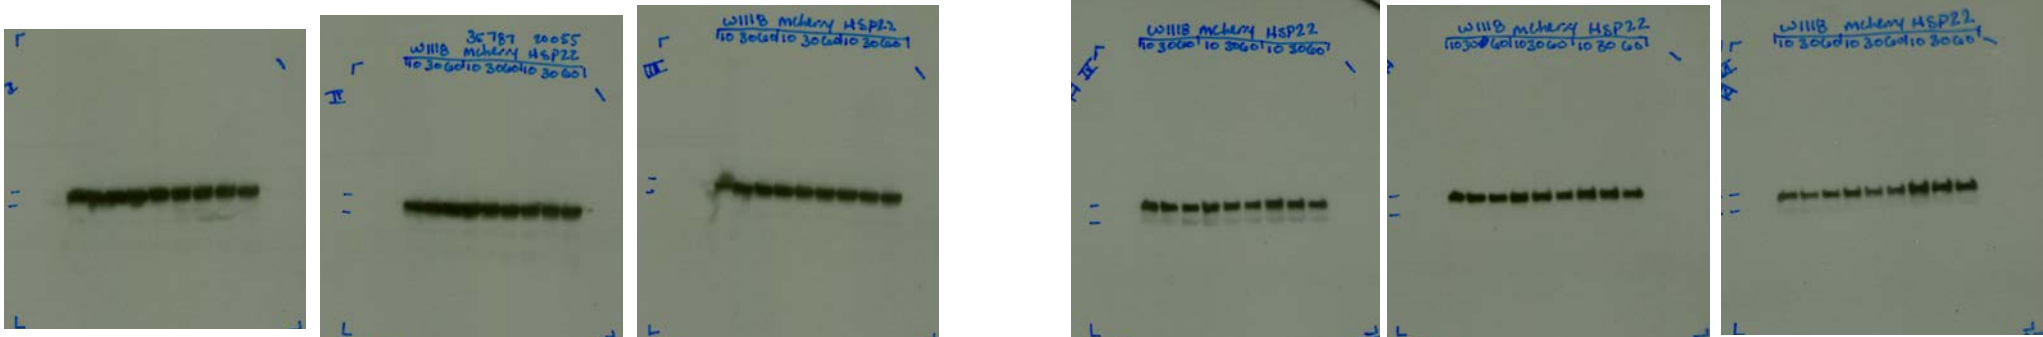

Supplementary Figure 3: Additional Blots Used in Quantification FlucDM-EGFP Akh Heads/Thoraces Anti-GFP

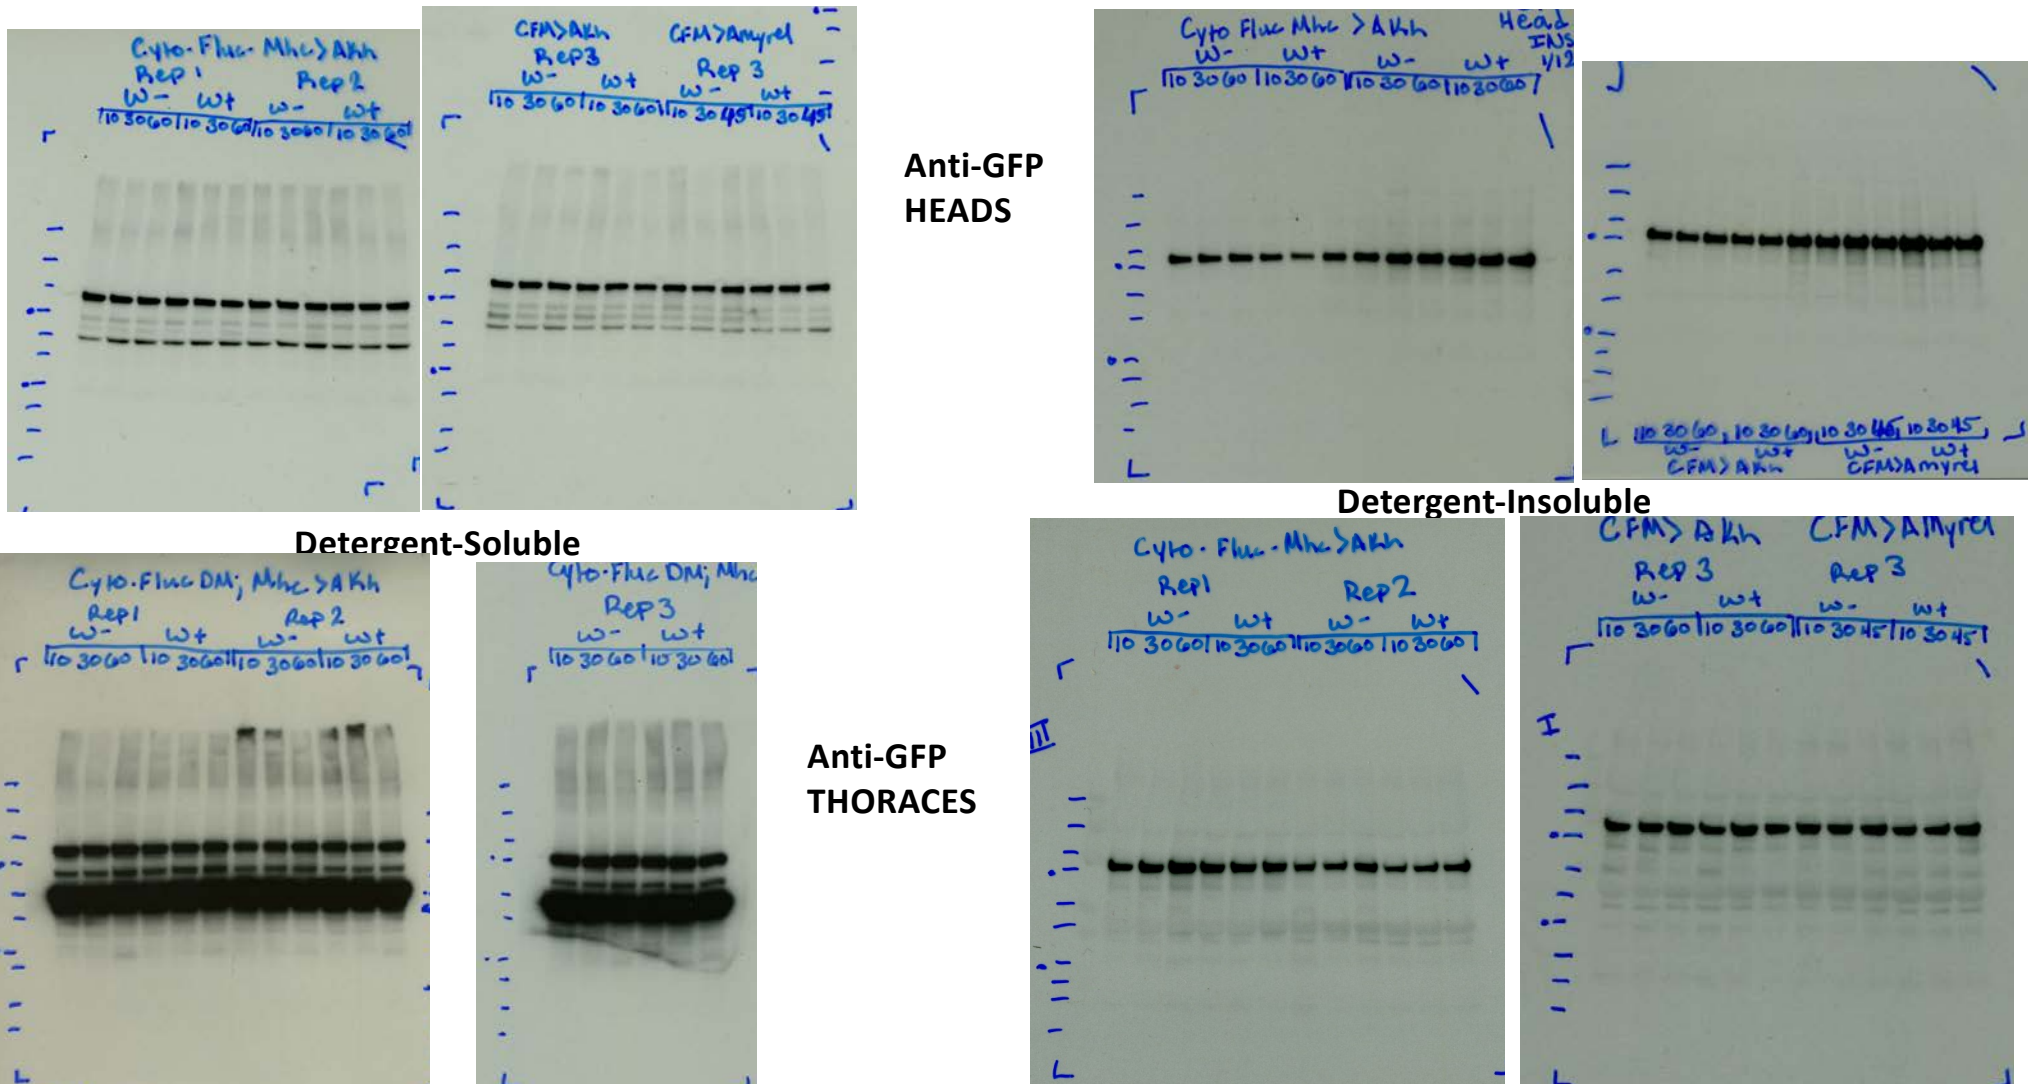

Supplementary Figure 3: Additional Blots Used in Quantification FlucDM-EGFP Akh Heads/Thoraces Anti-Beta Actin

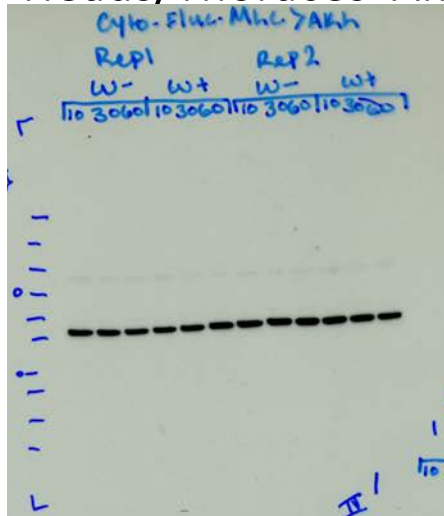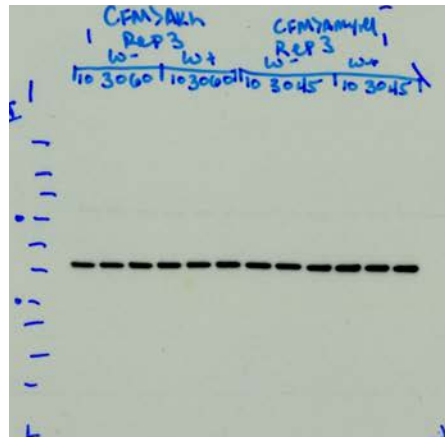

Anti-Beta Actin HEADS

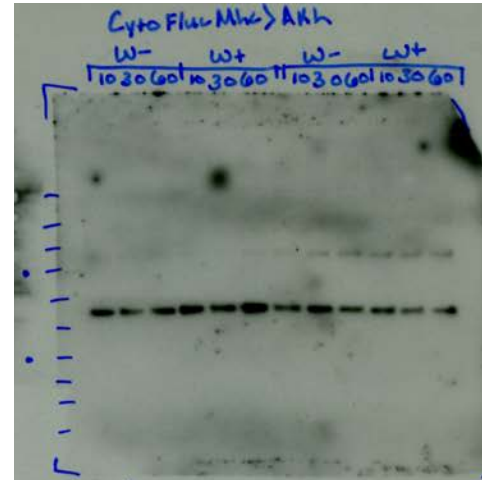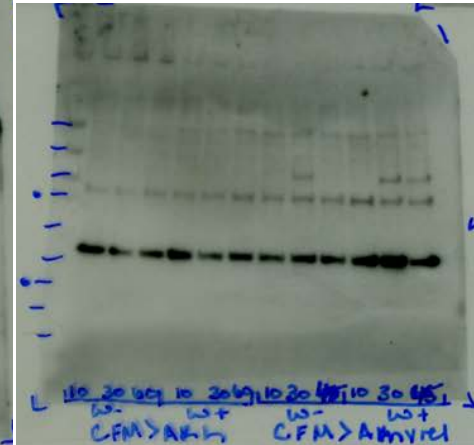

Detergent-Soluble

Detergent-Insoluble

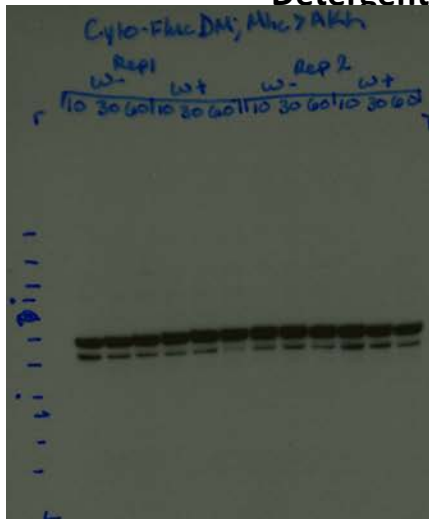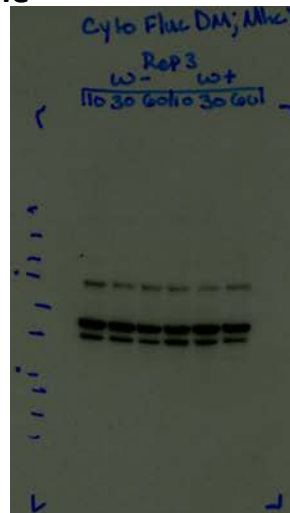

Anti-Beta Actin THORACES

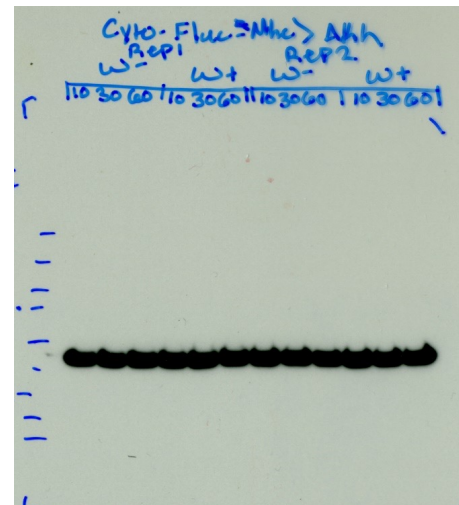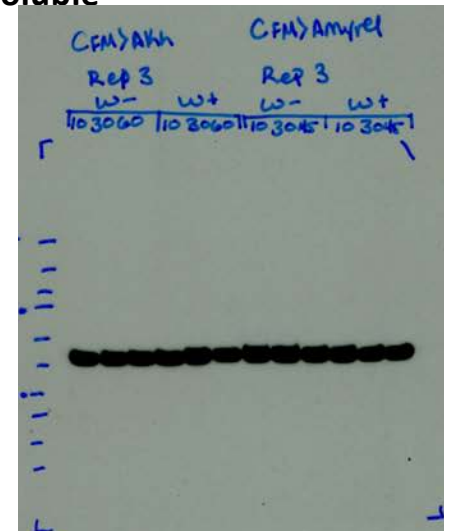

### Supplementary Figure 3: Additional Blots Used in Quantification mito-FlucDM-EGFP Akh Heads/Thoraces Anti-GFP

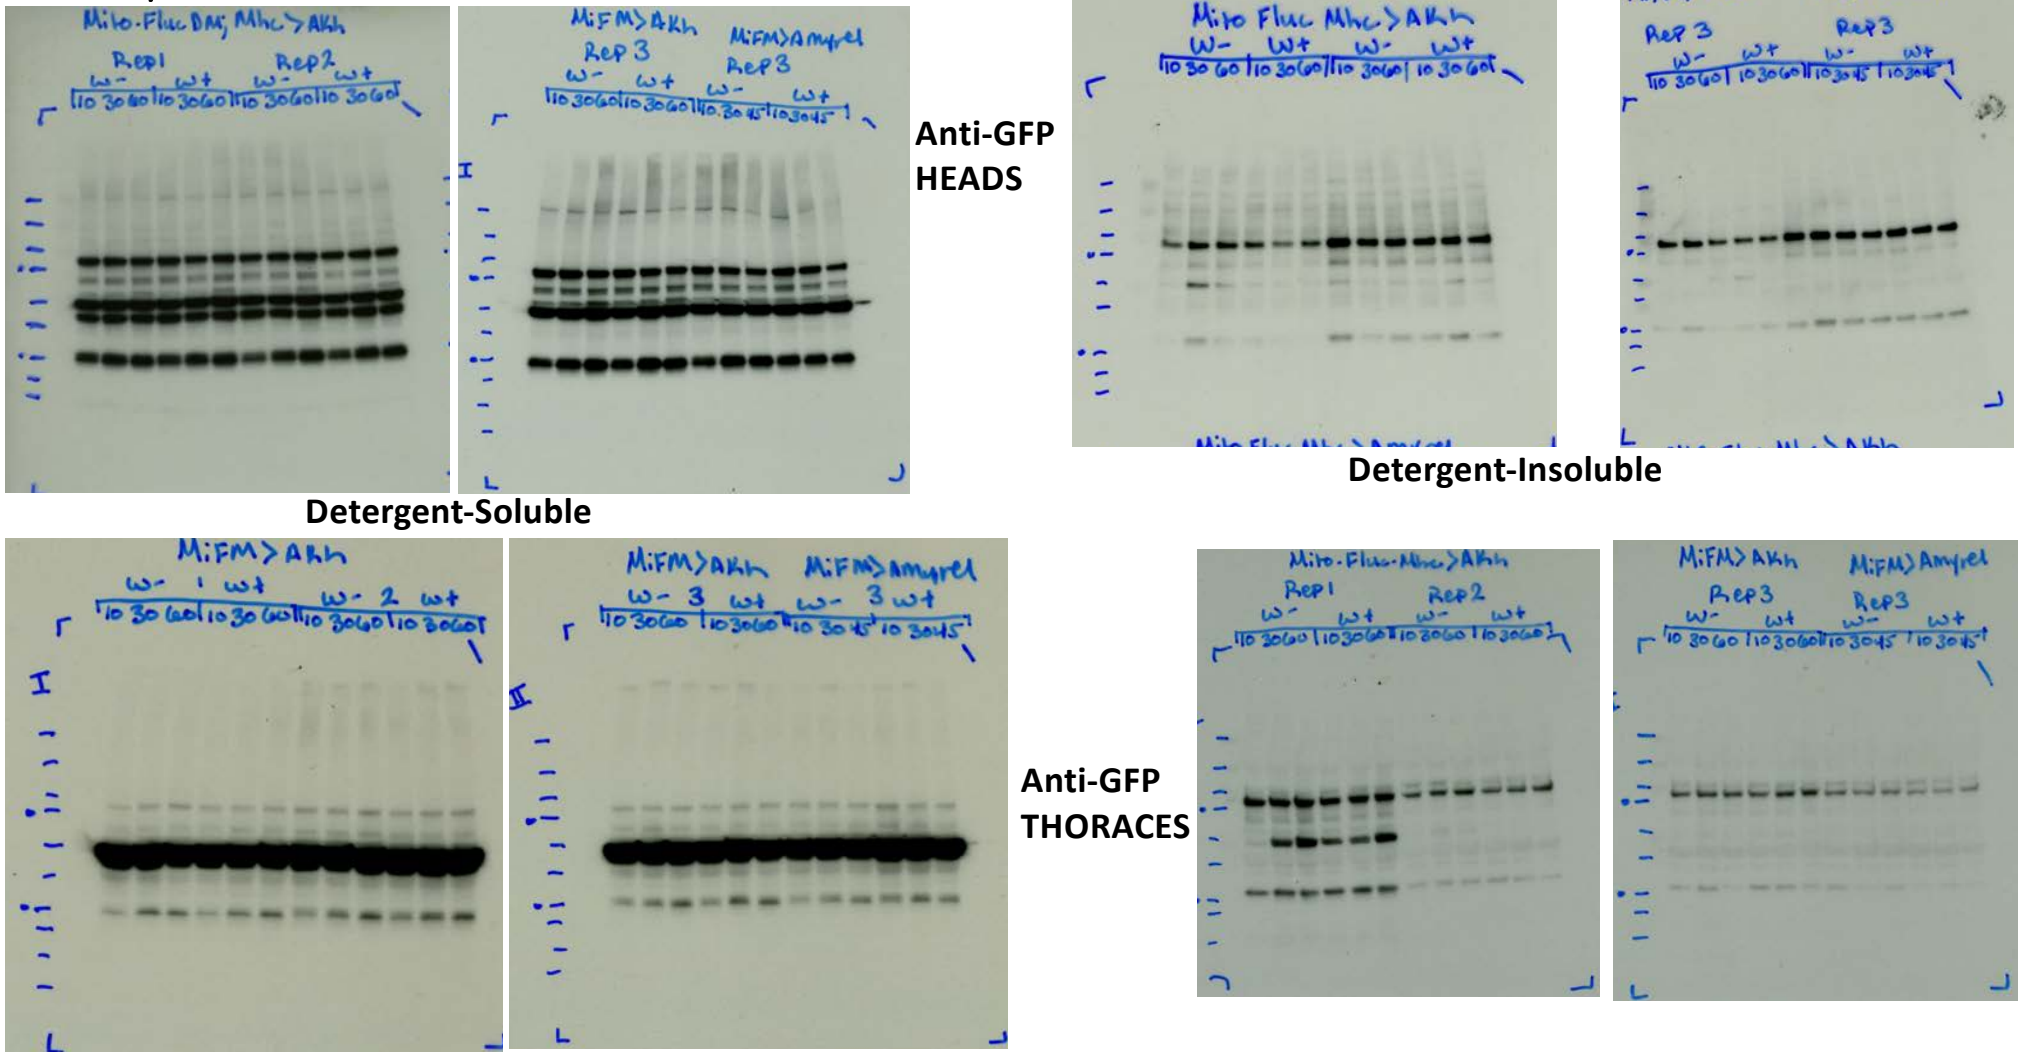

# Supplementary Figure 3: Additional Blots Used in Quantification mito-FlucDM-EGFP Akh Heads/Thoraces Anti-Beta Actin

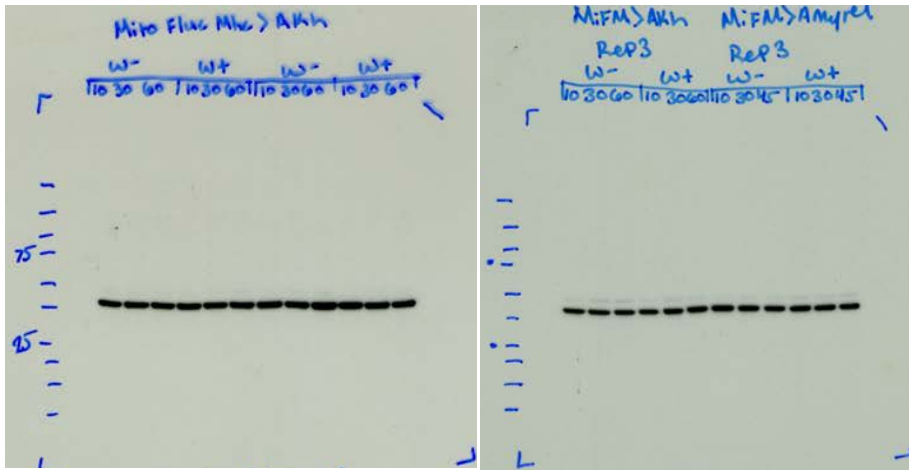

Detergent-Soluble

Anti-Beta Actin HEADS

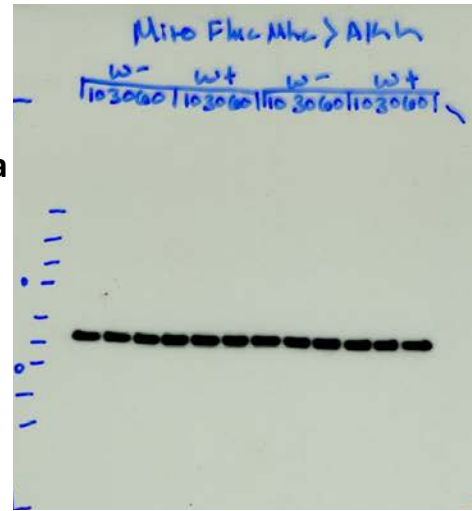

Detergent-Insoluble

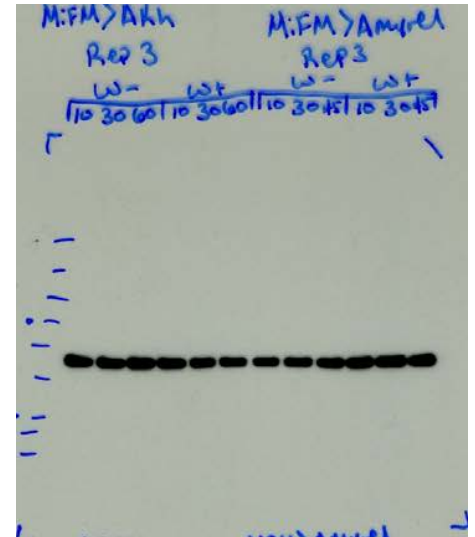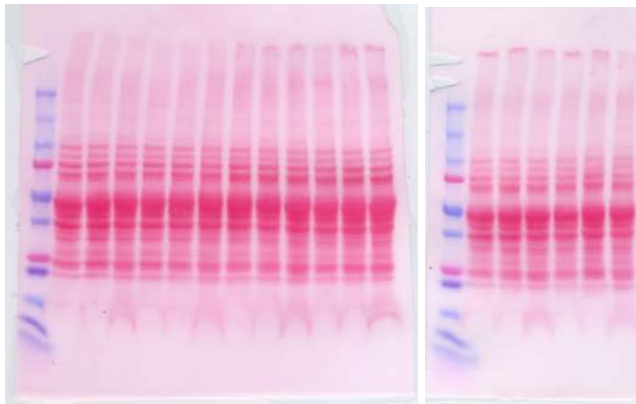

Anti-Beta Actin THORACES

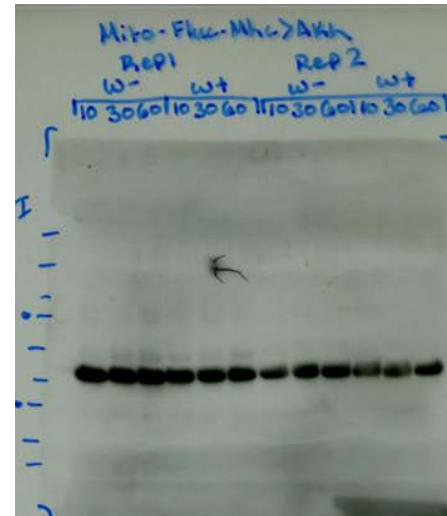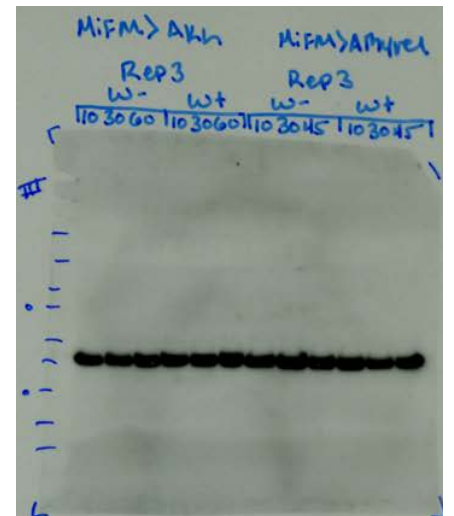



### Supplementary Figure 3: Additional Blots Used in Quantification NLS-FlucDM-EGFP Akh Heads/Thoraces Anti-GFP

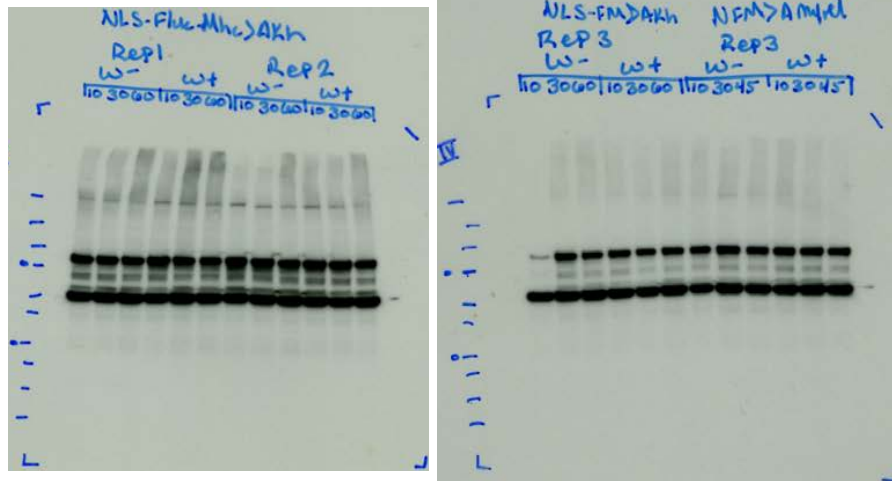

Detergent-Soluble

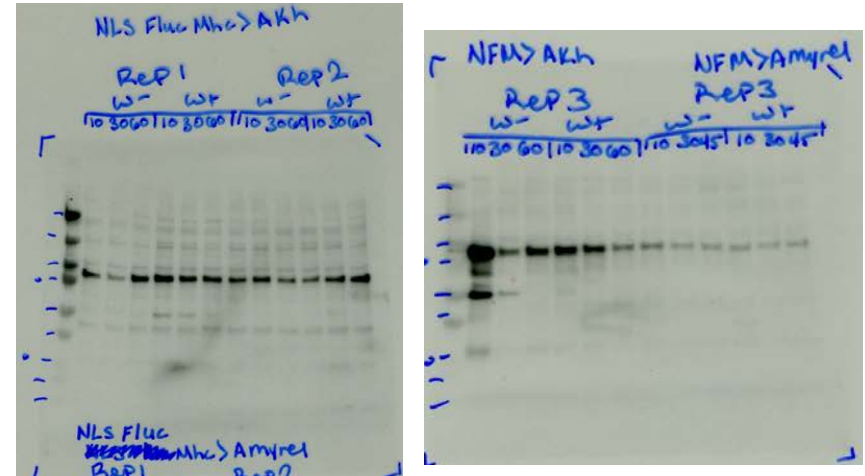

Detergent-Insoluble

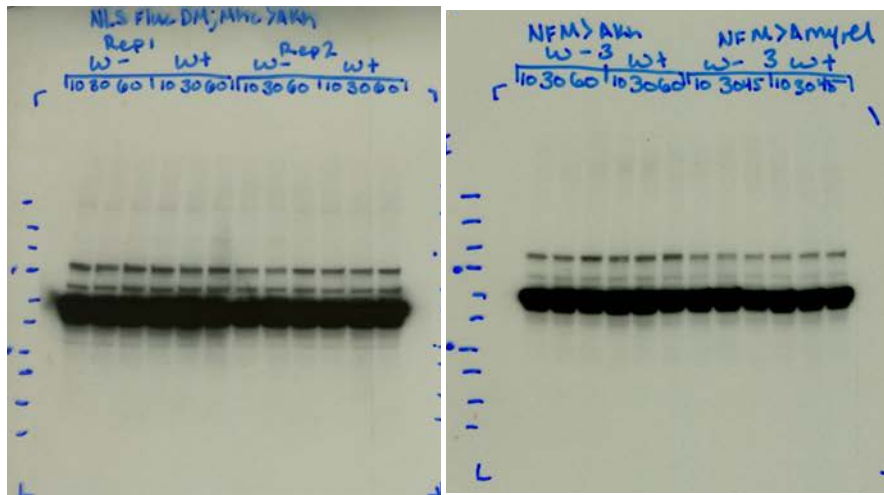

Anti-GFP THORACES

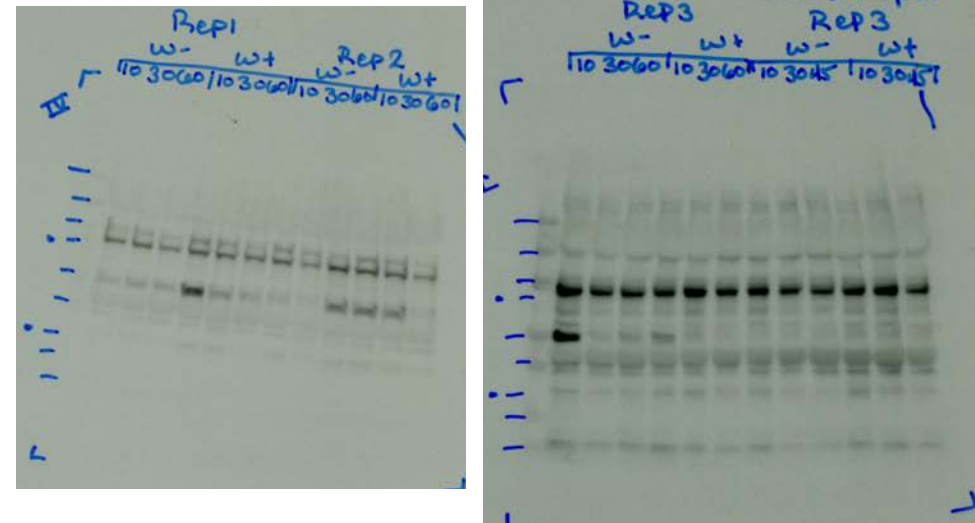

### Supplementary Figure 3: Additional Blots Used in Quantification NLS-FlucDM-EGFP Akh Heads/Thoraces Anti-Beta Actin

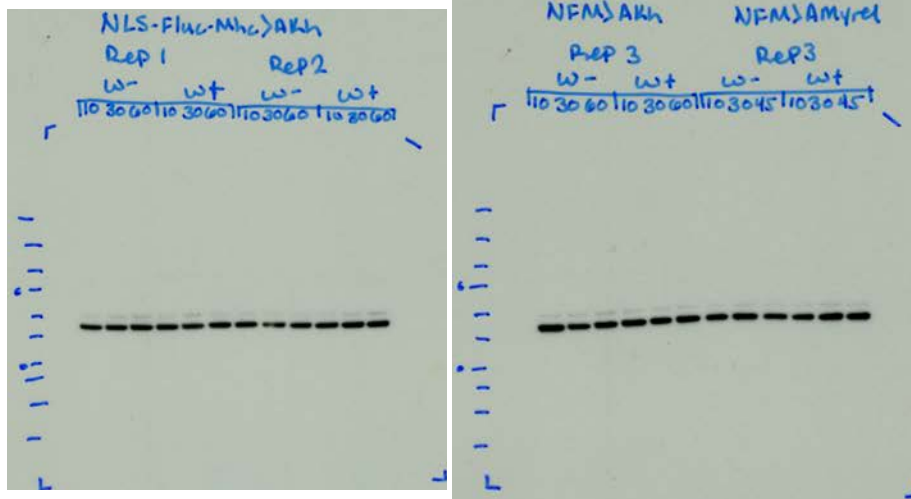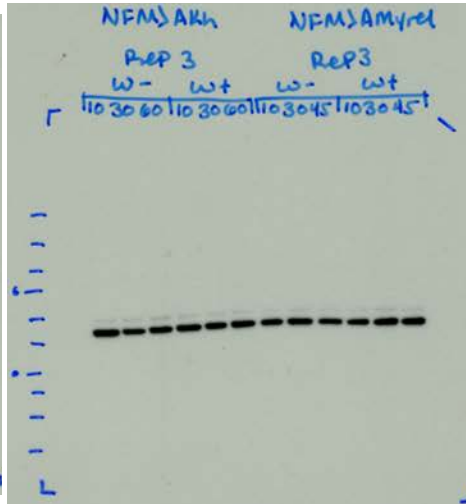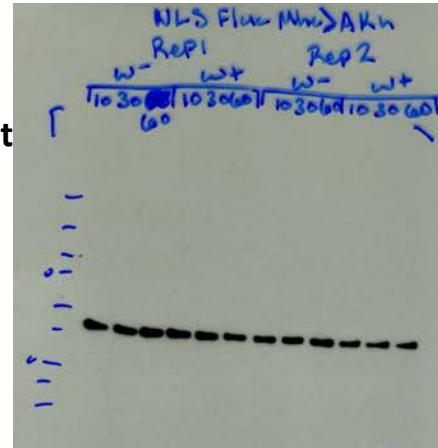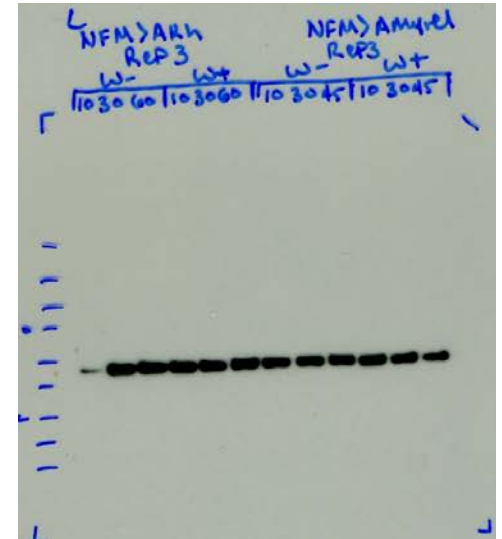

Anti-Beta Actin HEADS

Detergent-Soluble

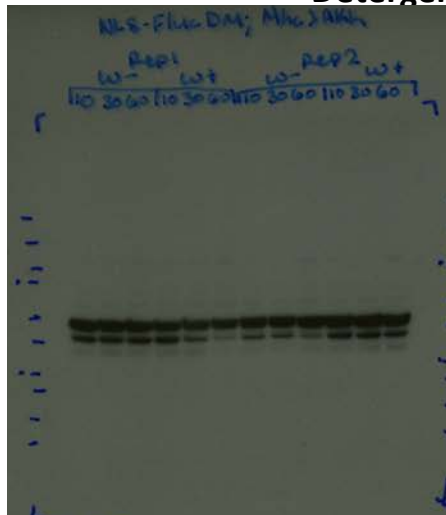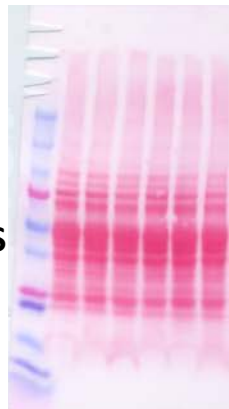

Anti-Beta Actin THORACES

Detergent-Insoluble

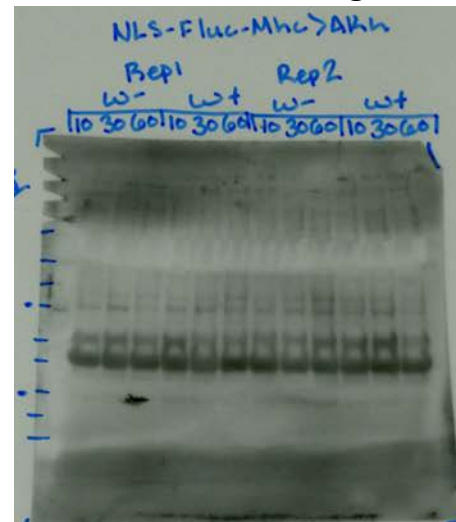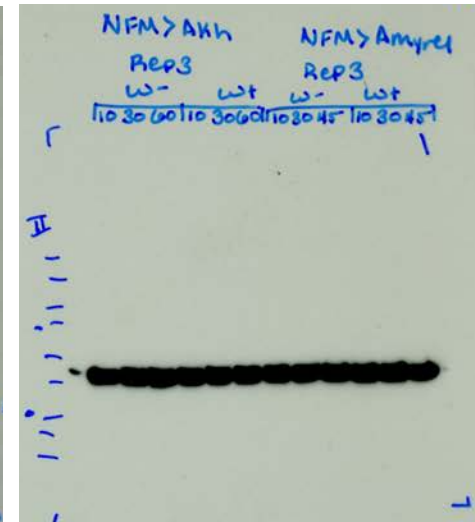

Blots Used in Quantitation for Supplementary Figure 5: FlucDM-EGFP Amyrel Thoraces

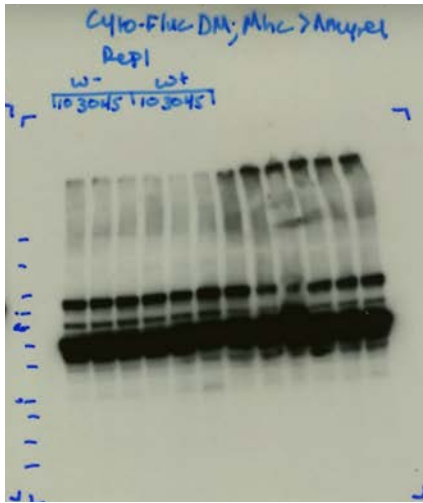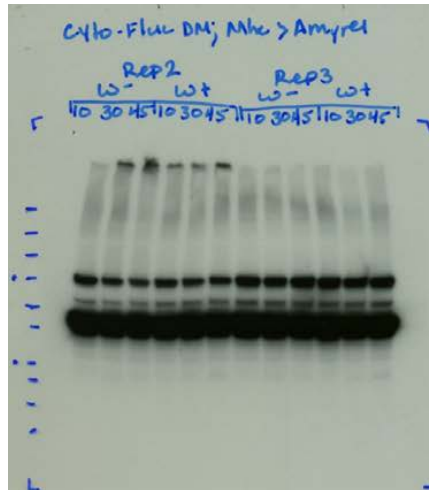

Anti-GFP

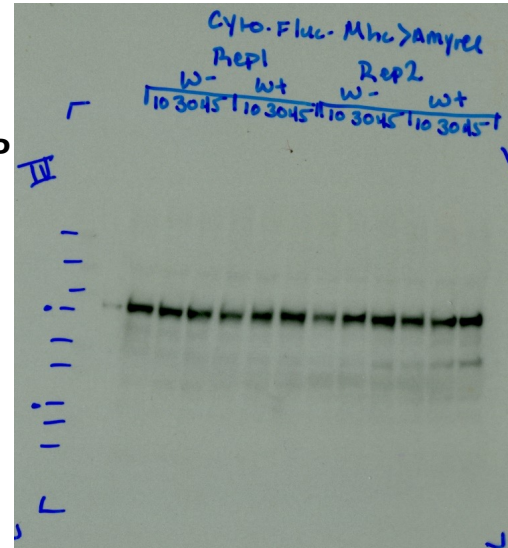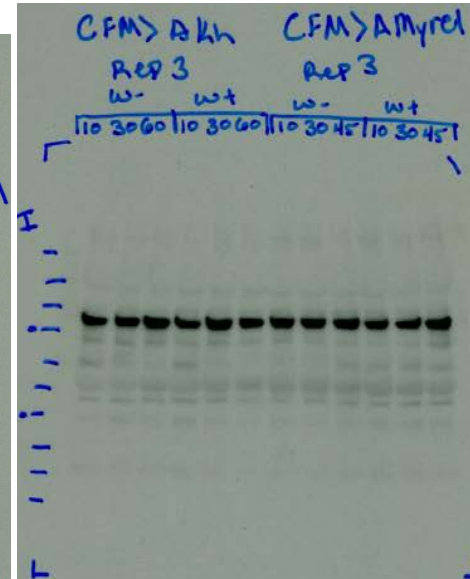

Detergent-Soluble

Detergent-Insoluble

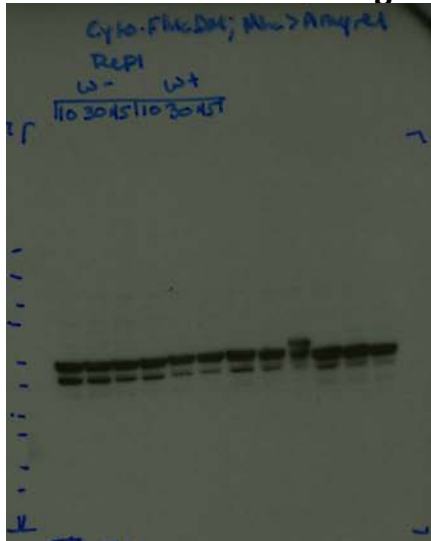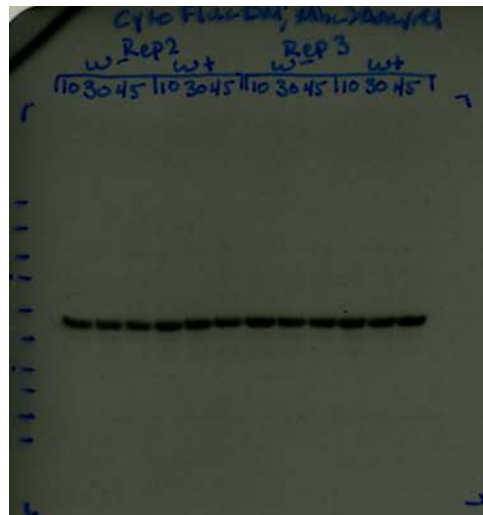

Anti-Beta Actin

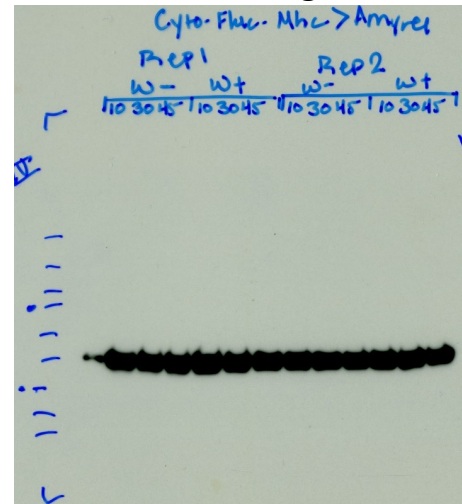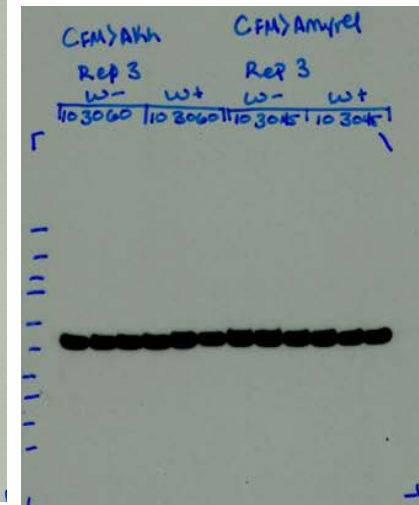

# Blots Used in Quantitation for Supplementary Figure 5: mito-FlucDM-EGFP Amyrel Thoraces

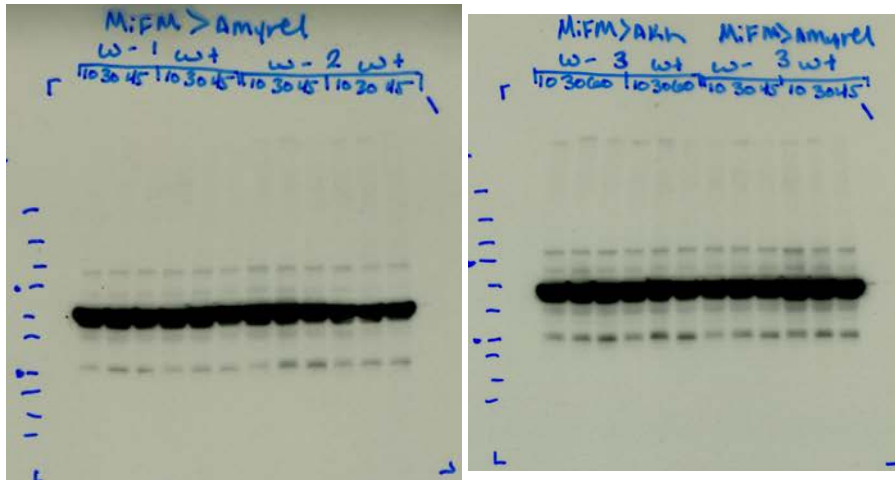

Detergent-Soluble

Anti-GFP

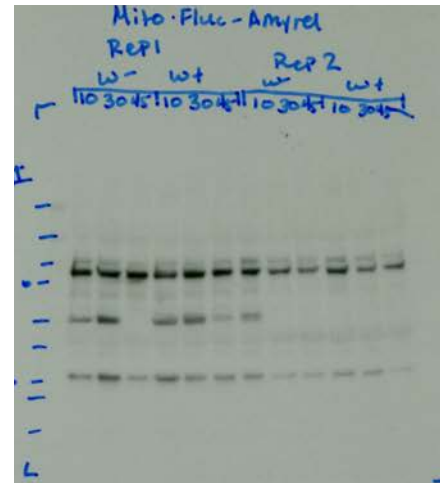

Detergent-Insoluble

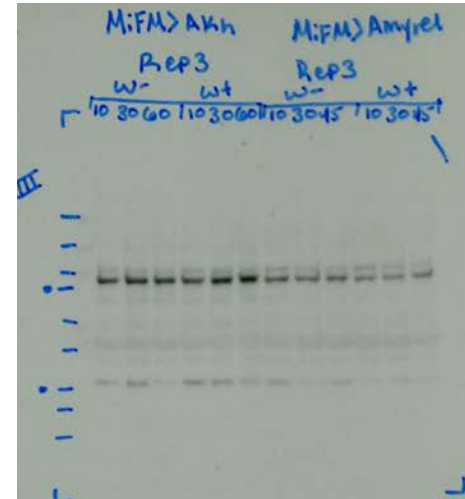

Anti-Beta Actin

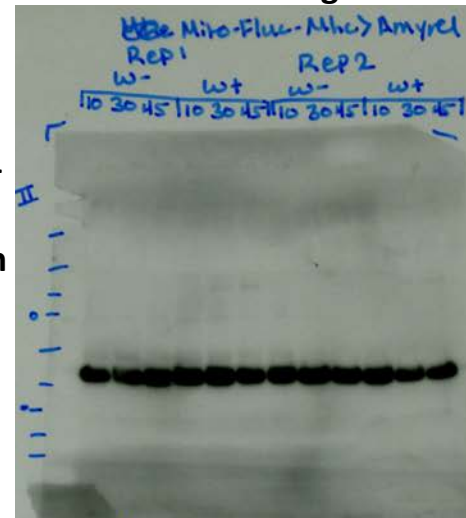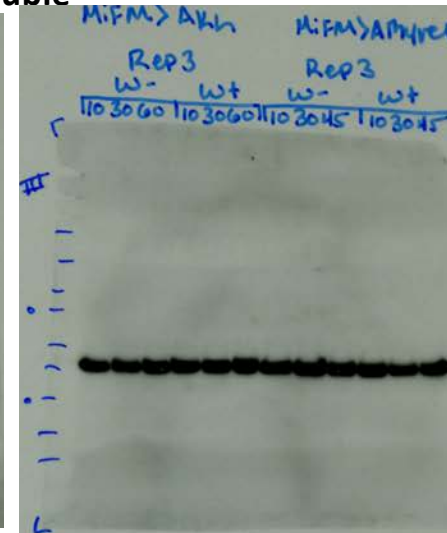

Blots Used in Quantitation for Supplementary Figure 5:  
NLS-FlucDM-EGFP Amyrel Thoraces

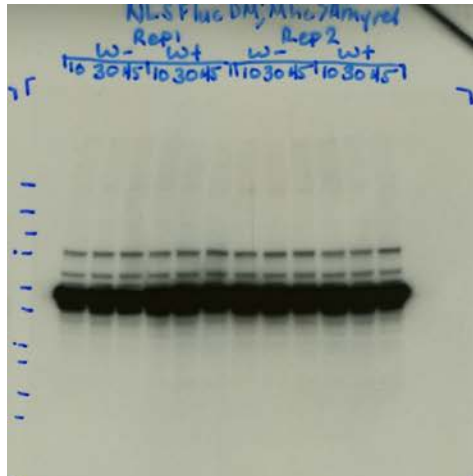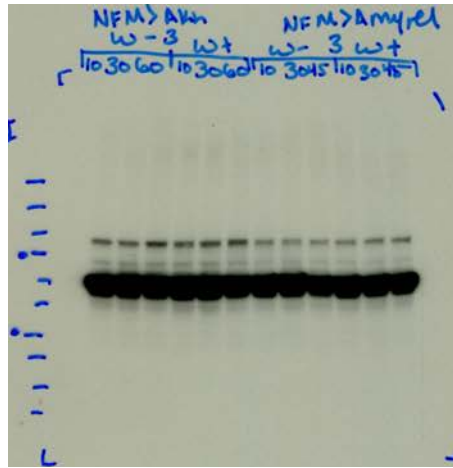

Anti-GFP

Detergent-Soluble

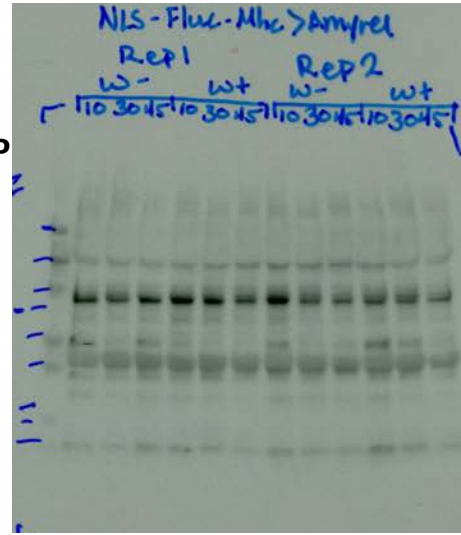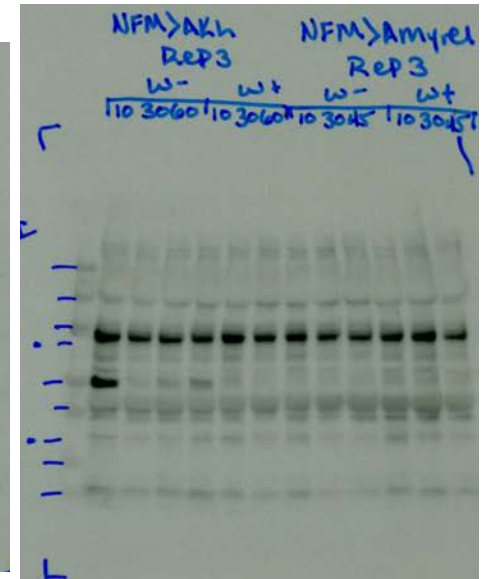

Detergent-Insoluble

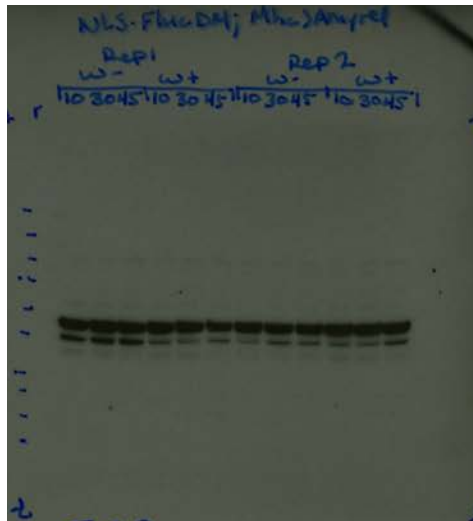

Anti-  
Beta  
Actin

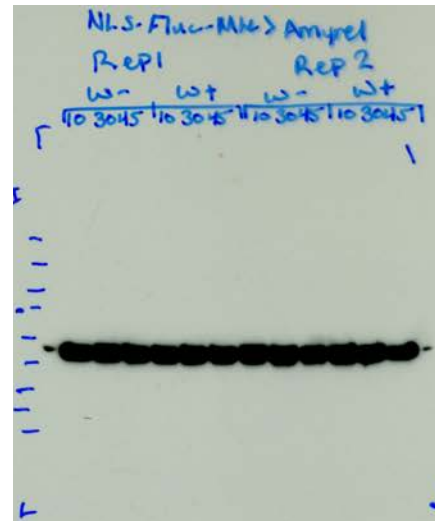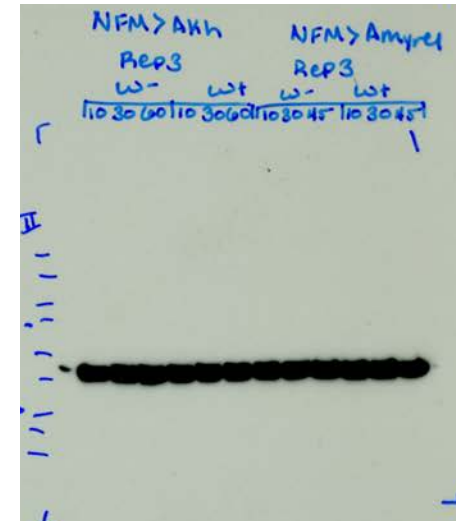

Supplement: mmc6.pdf [file mmc6.pdf]
