# Supplementary material for: Transgenic sensors reveal compartment-specific effects of aggregation-prone proteins on subcellular proteostasis during aging
Source: PubMed Central journal article supplement — Cell Rep Methods. 2024 Oct 8;4(10):100875. doi: 10.1016/j.crmeth.2024.100875 (PMC11573793; doi:10.1016/j.crmeth.2024.100875), 2024-10-08
Supplement: mmc1.pdf [file mmc1.pdf]

**Cell Reports Methods, Volume 4**

**Supplemental information**

**Transgenic sensors reveal compartment-specific  
effects of aggregation-prone proteins  
on subcellular proteostasis during aging**

**Michelle Curley, Mamta Rai, Chia-Lung Chuang, Vishwajeeth Pagala, Anna Stephan, Zane Coleman, Maricela Robles-Murguia, Yong-Dong Wang, Junmin Peng, and Fabio Demontis**

# Supplemental Figures

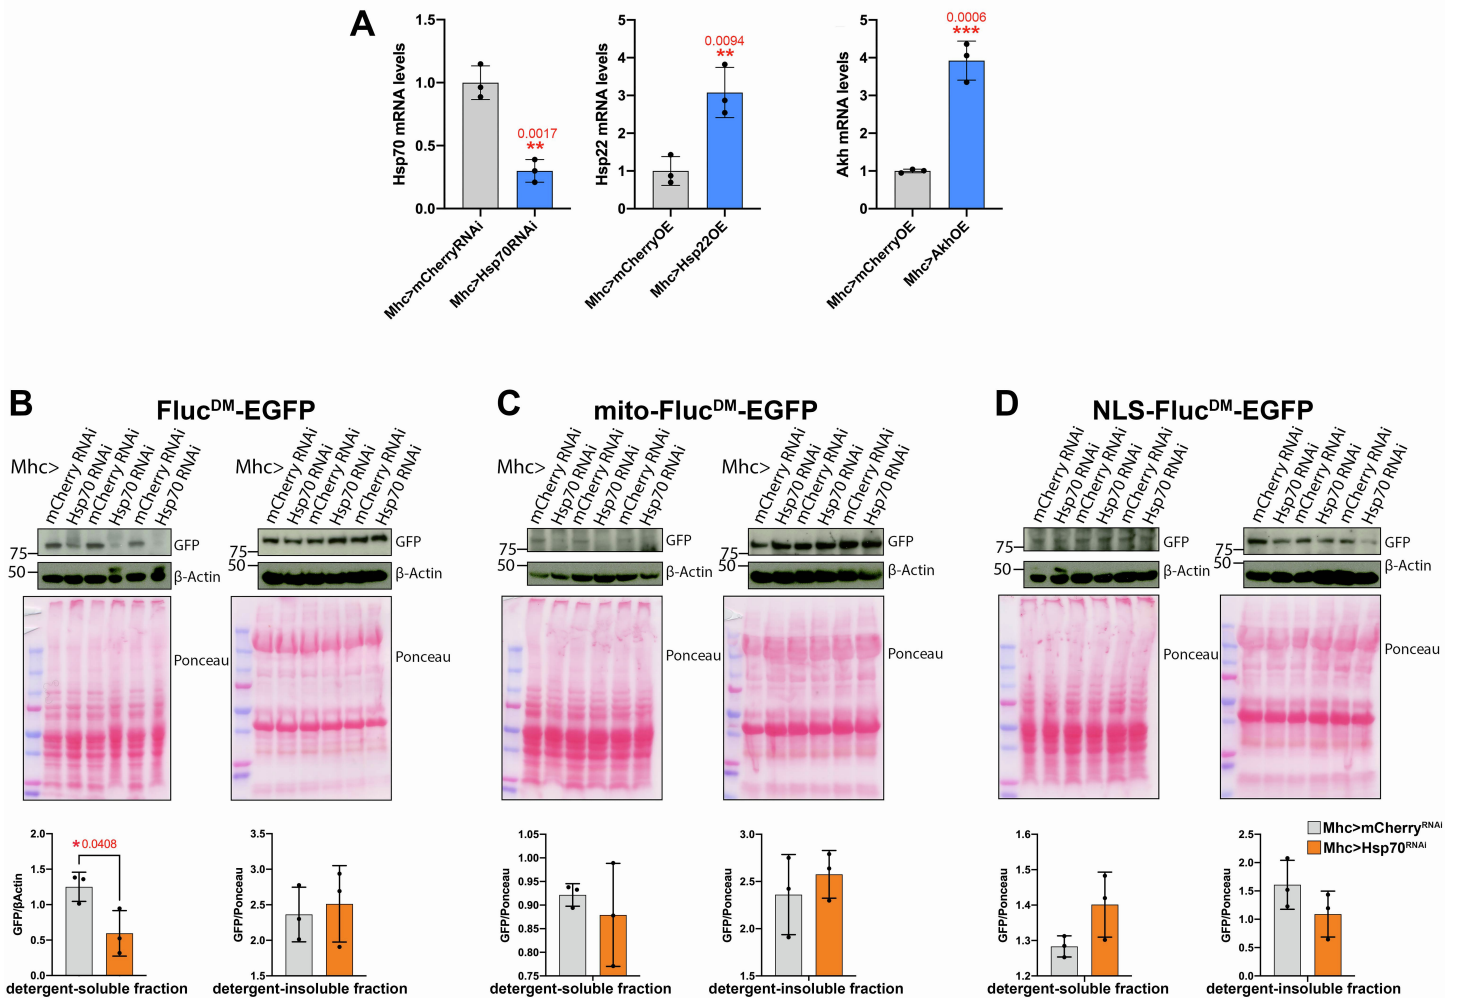

**Figure S1. Hsp70 knockdown reduces the detergent-soluble levels of cytoplasmic Fluc<sup>DM</sup>, related to Fig. 4.**

(A) qRT-PCR validation of transgene expression. As expected, *Hsp70* mRNA levels decrease in response to *Hsp70* RNAi in skeletal muscle whereas *Hsp22* mRNA levels increase in response to *Hsp22* overexpression. *Akh* mRNA levels increase upon *Akh* overexpression. In (A-B),  $n=3$  (biological replicates) with the mean  $\pm$ SD indicated; \*\* $P<0.01$ , \*\*\* $P<0.001$  (unpaired two-tailed t-test).

(B-D) Western blots of detergent-soluble and insoluble fractions from skeletal muscle with *Hsp70* knockdown (*Mhc>Hsp70<sup>RNAi</sup>*; orange) versus controls (*Mhc>mCherry<sup>RNAi</sup>*; gray). Anti-GFP antibodies were used to detect the EGFP-tagged Fluc<sup>DM</sup> variants targeted to the cytoplasm (Fluc<sup>DM</sup>; (B)), the mitochondria (mito-Fluc<sup>DM</sup>; (C)), and the nucleus (NLS-Fluc<sup>DM</sup>; (D)). Ponceau staining and  $\beta$ -actin are shown as normalization control. *Hsp70* RNAi significantly decreases the detergent-soluble levels of the untargeted (~cytoplasmic) Fluc<sup>DM</sup> whereas NLS-Fluc<sup>DM</sup> and mito-Fluc<sup>DM</sup> are not affected.  $N=3$  (biological replicates) with the mean  $\pm$ SD indicated; \* $P<0.05$  (unpaired two-tailed t-test).

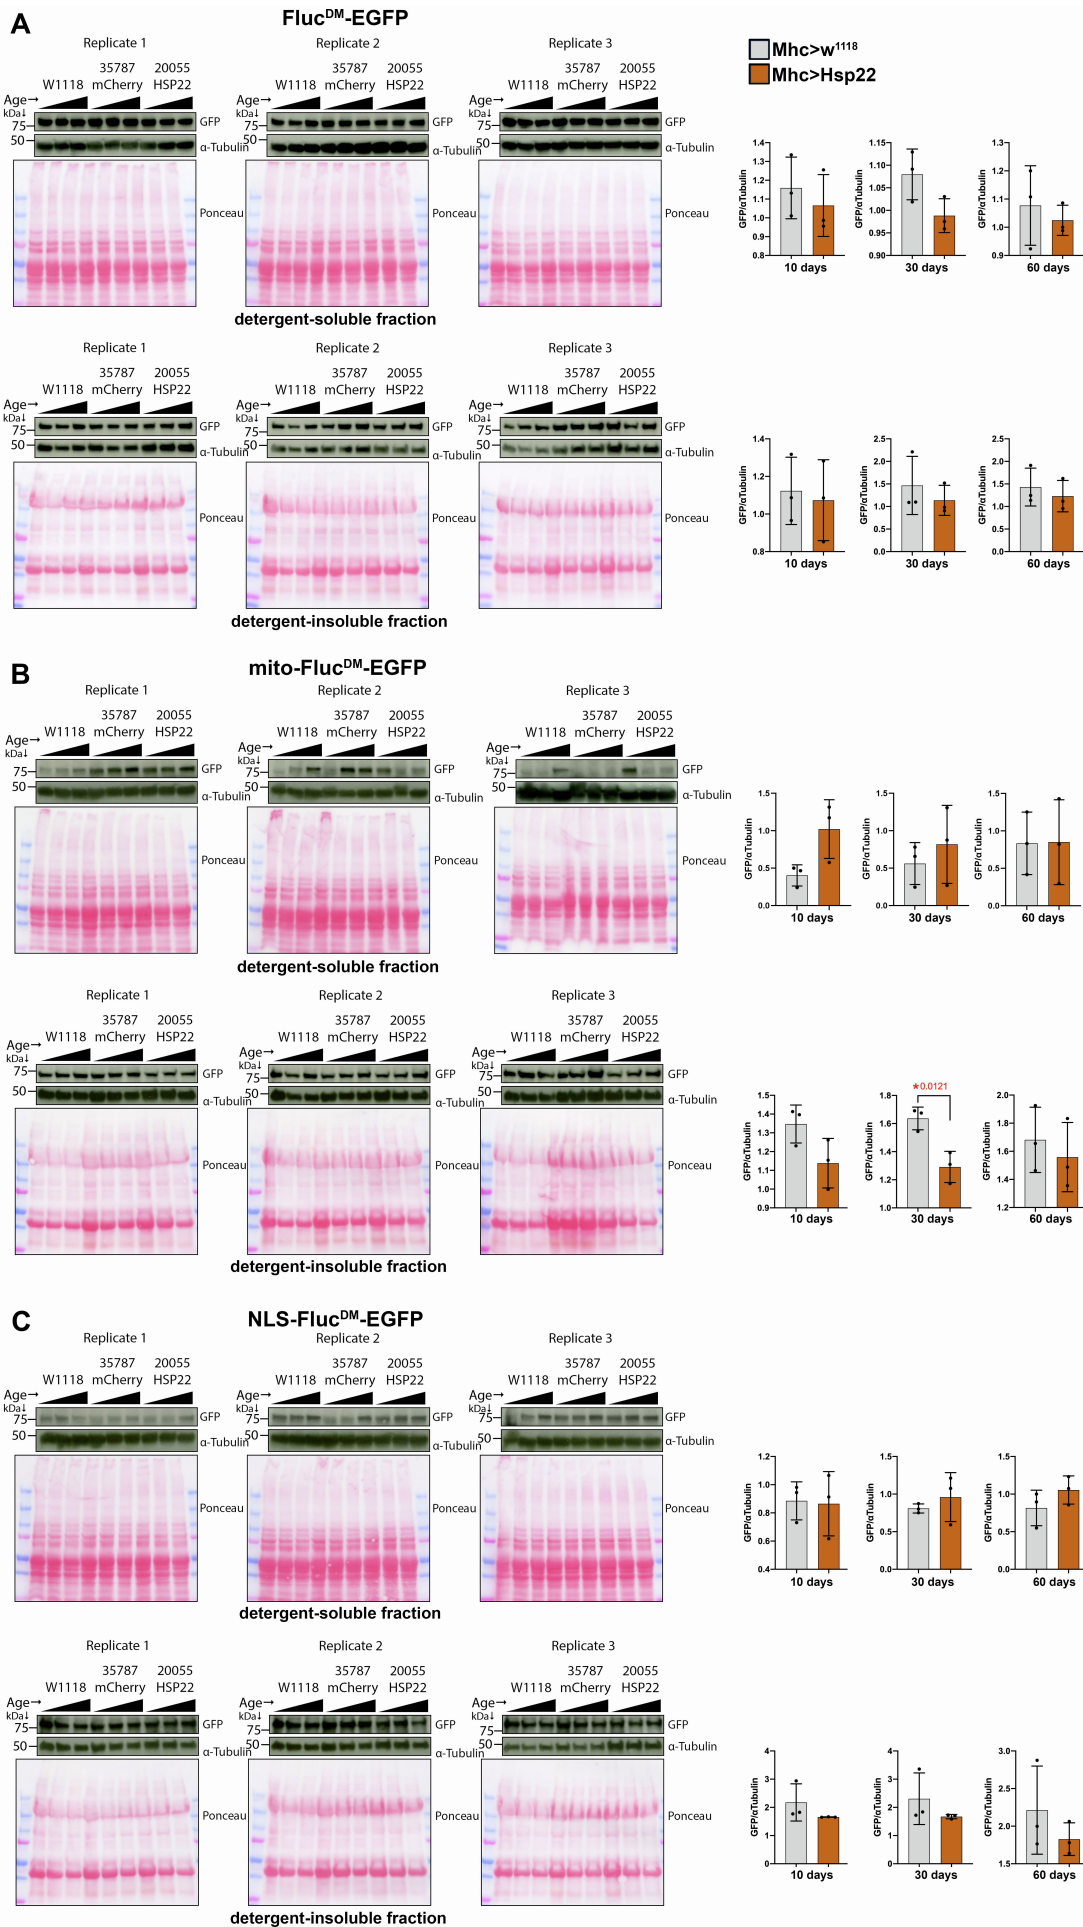

**Figure S2. Hsp22 overexpression reduces the detergent-insoluble levels of mitochondrial Fluc<sup>DM</sup>, related to Fig. 4.**

(A-C) Western blots of detergent-soluble and insoluble fractions from skeletal muscle with Hsp22 overexpression (*Mhc>Hsp22*; brown) versus controls (*Mhc>w<sup>1118</sup>*; gray). Anti-GFP antibodies were used to detect the EGFP-tagged Fluc<sup>DM</sup> variants targeted to the cytoplasm (Fluc<sup>DM</sup>; (A)), the mitochondria (mito-Fluc<sup>DM</sup>; (B)), and the nucleus (NLS-Fluc<sup>DM</sup>; (C)). Ponceau staining and  $\alpha$ -tubulin are shown as normalization control. Hsp22 overexpression decreases the detergent-insoluble levels of mito-Fluc<sup>DM</sup> (B). N=3 (biological replicates) with the mean  $\pm$ SD; \* $P$ <0.05 (unpaired two-tailed t-test).

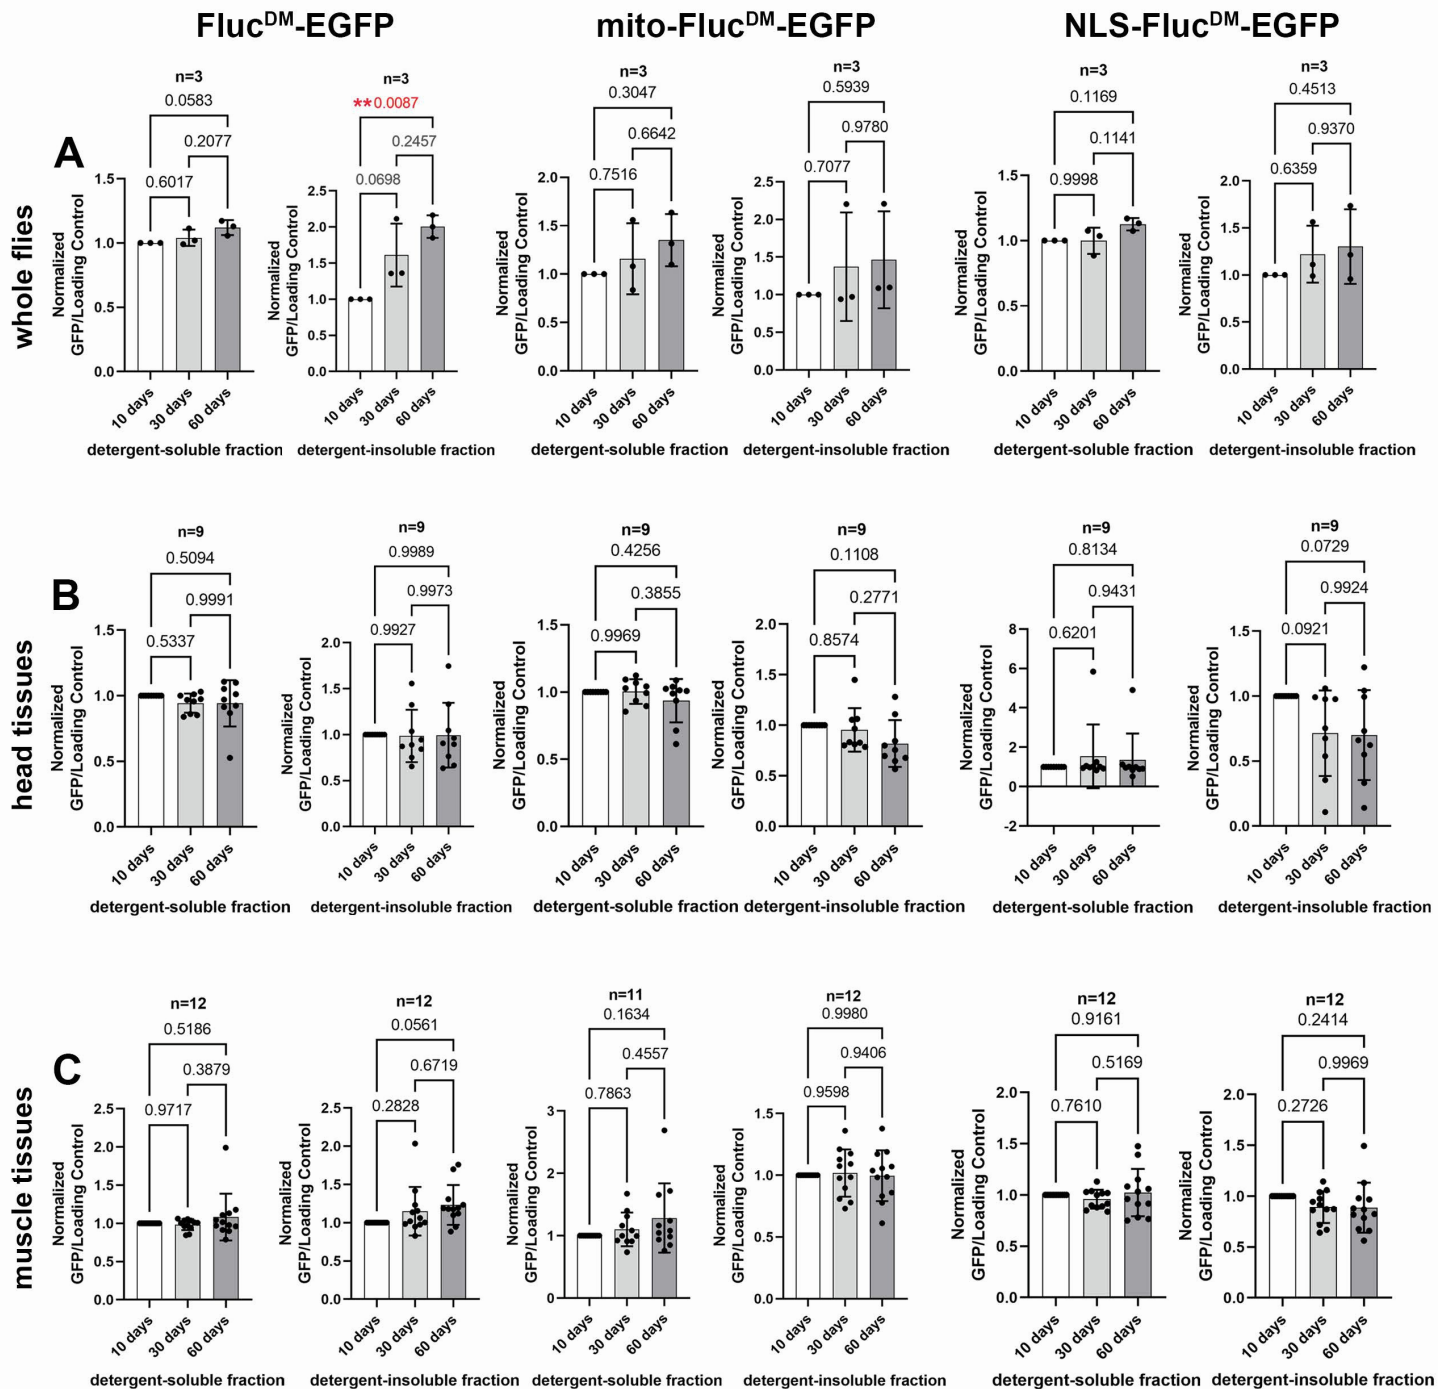

**Figure S3. The solubility of Fluc<sup>DM</sup> sensors is overall maintained during normal aging in *Drosophila*, related to Fig. 4.**

(A-C) Western blots of detergent-soluble and insoluble fractions from whole flies (A), heads (B), and thoraces (C) at different ages (10, 30, and 60 days of age). There is a significant increase in the detergent-insoluble levels of Fluc<sup>DM</sup> (but not of mito-Fluc<sup>DM</sup> and NLS-Fluc<sup>DM</sup>) with aging in extracts from whole flies. However, there is no modulation of the detergent-soluble and insoluble-levels of Fluc<sup>DM</sup>, mito-Fluc<sup>DM</sup>, and NLS-Fluc<sup>DM</sup> in heads and thoraces, which are enriched respectively for tissues of the central nervous system and skeletal muscle. The n(biological replicates) is indicated in each figure, with the mean  $\pm$ SD; \*\* $P < 0.01$  (one-way ANOVA).

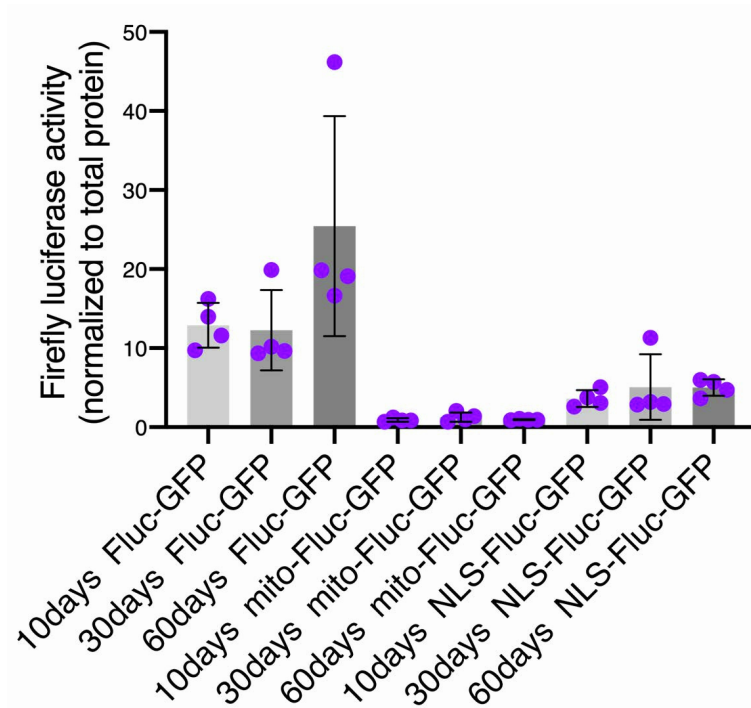

**Figure S4. Monitoring the folding and activity of compartment-targeted Fluc<sup>DM</sup> variants with luciferase assays, related to Fig. 4.** Firefly luciferase assays from thoraces of flies with Fluc<sup>DM</sup>-GFP, mito-Fluc<sup>DM</sup>-GFP, and NLS-Fluc<sup>DM</sup>-GFP at different ages (10, 30, and 60 days). The luminescence is normalized by the total protein content. There is no significant age-associated change in the luciferase activity of each Fluc<sup>DM</sup> sensor in skeletal muscle (thoraces), consistent with the western blot results in Fig. S3C. The mean  $\pm$ SD is shown with n=4.

The activity of the mitochondrial and nuclear luciferases (mito-Fluc<sup>DM</sup>-GFP and NLS-Fluc<sup>DM</sup>-GFP) is lower than that of the general, ~cytoplasmic Fluc<sup>DM</sup>-GFP luciferase, presumably because the nuclear and mitochondrial luciferases are less active or less stable than the general Fluc<sup>DM</sup> due to compartment-specific challenges to their activity and/or stability.

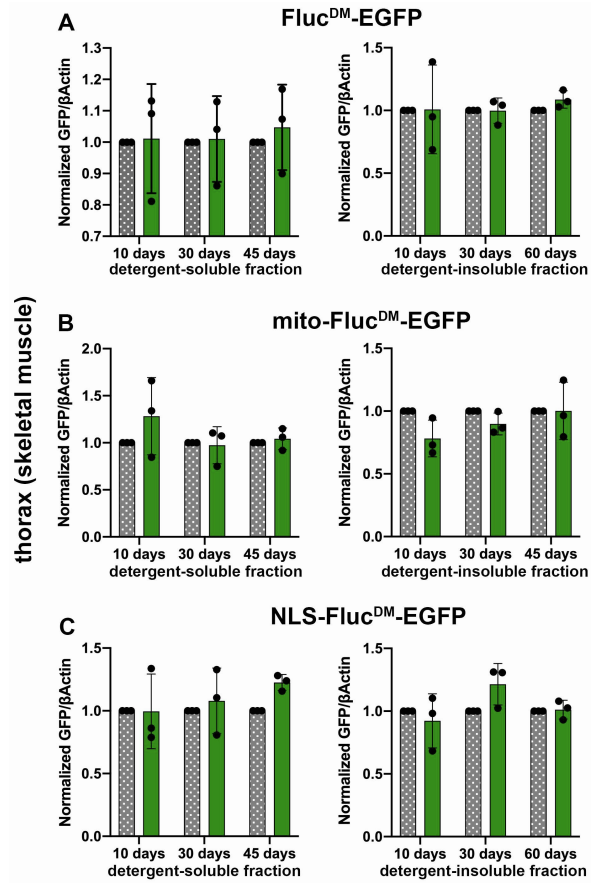

**Figure S5. Amyrel does not regulate Fluc<sup>DM</sup> solubility in skeletal muscle during aging, related to Fig. 5.** (A-C) Quantification of normalized GFP/ $\beta$ -actin levels from western blots of thoracic extracts indicates that Amyrel (green) does not regulate proteostasis in skeletal muscles when compared to controls (gray).

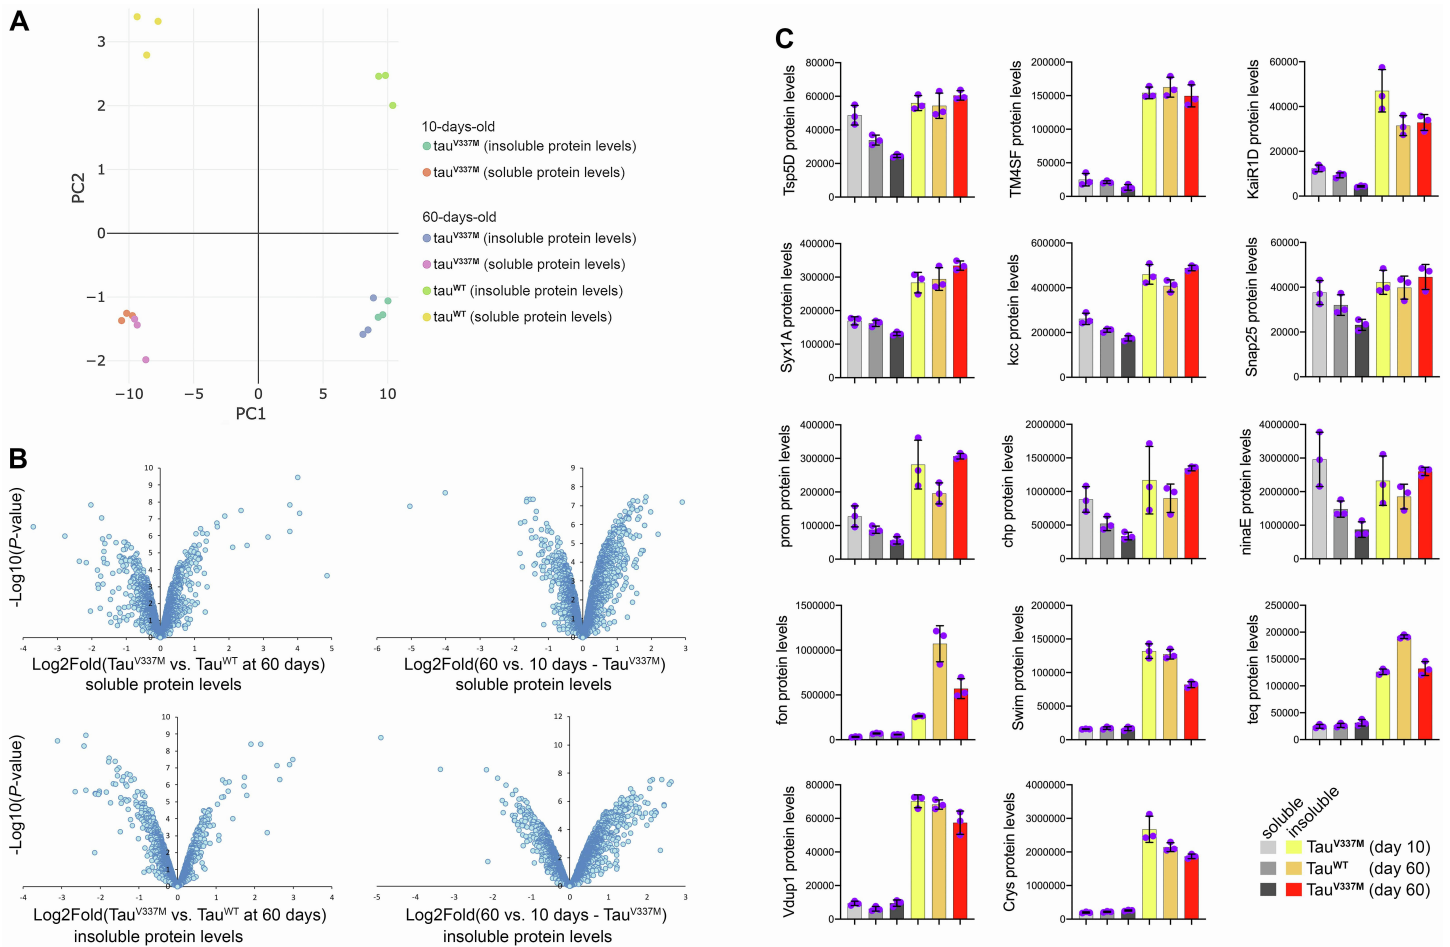

**Figure S6. Changes in protein solubility induced by pathogenic tau<sup>V337M</sup>, tau<sup>WT</sup>, and aging in *Drosophila*, related to Fig. 7.** (A) PCA of proteomics of detergent-soluble and insoluble fractions. (B) Overall representation of the proteomic changes induced by tau in detergent-soluble and insoluble fractions. The y-axis reports the  $-\log_{10}(P\text{-value})$  whereas the x-axis displays the  $\log_2\text{Fold}$  changes induced by tau<sup>V337M</sup> versus tau<sup>WT</sup> in old age (left panels), and by tau<sup>V337M</sup> at ~60 days versus 10 days (right panels) for the soluble (top panels) and insoluble (bottom panels) protein levels. (C) Graphs of detergent-soluble and insoluble levels of selected proteins with tau<sup>V337M</sup>-induced changes in solubility. These graphs refer to the examples shown in Fig. 7H-I and report the detergent-soluble and insoluble levels of significantly regulated proteins (all  $P < 0.05$ ). N=3 (biological replicates) with the mean  $\pm$ SD indicated.



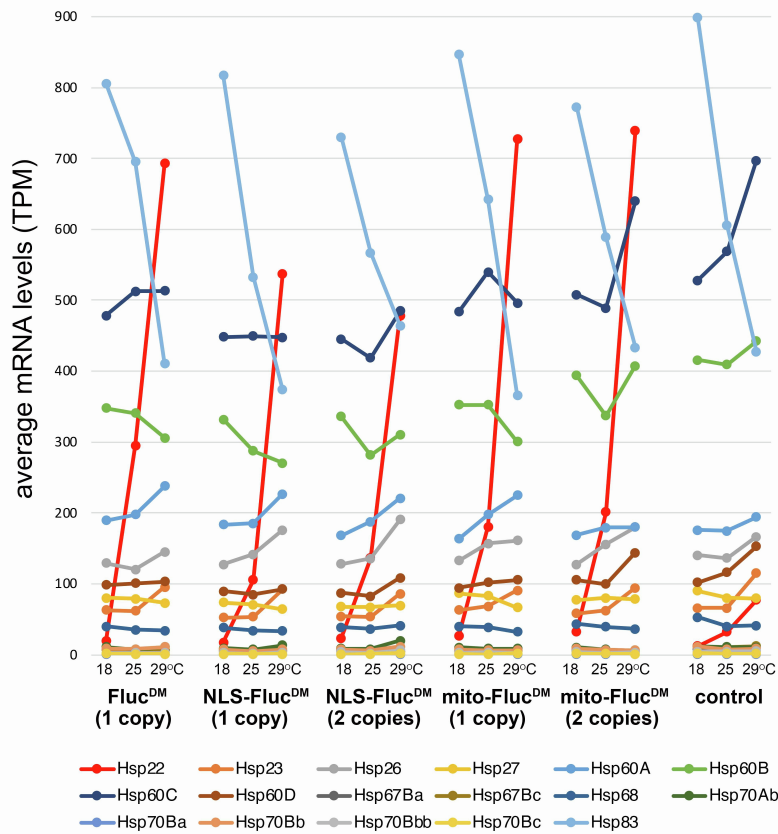

**Figure S7. Fluc<sup>DM</sup> proteins do not induce a heat shock response, related to Fig. 3.** The average mRNA levels (TPM) of heat shock proteins were obtained from 3 biological replicates (Table S1). Compartment-targeted Fluc<sup>DM</sup> variants do not have a major impact on the expression of heat shock proteins, compared to controls with no Fluc<sup>DM</sup> expression. However, all Fluc<sup>DM</sup> variants strongly induce the mitochondrial chaperone Hsp22 (red): this occurs at 18°C and even more noticeably at 25°C and 29°C. Similar changes are induced by 1 versus 2 copies of the Fluc<sup>DM</sup> transgenes. Apart from Hsp22, Fluc<sup>DM</sup> variants do not appear to induce a heat shock-like response as they do not upregulate the expression of multiple chaperones but only of Hsp22.
